# 1 Photoreceptor complexity accompanies adaptation to challenging 2 marine environments in Anthozoa

3

4 Sebastian G. Gornik<sup>‡,1</sup>, B. Gideon Bergheim<sup>‡,1</sup>, Nicholas S. Foulkes<sup>1,2\*</sup> and Annika Guse<sup>1\*</sup>

5

6 <sup>1</sup>Centre for Organismal Studies, Heidelberg University, Heidelberg 69120, Germany.

7 <sup>2</sup>Institute of Biological and Chemical Systems, Karlsruhe Institute of Technology, Hermann-  
8 von-Helmholtz Platz 1, Eggenstein-Leopoldshafen 76344, Germany.

9 <sup>‡</sup>These authors contributed equally to this work.

10 \* Corresponding authors ([annika.guse@cos.uni-heidelberg.de](mailto:annika.guse@cos.uni-heidelberg.de); [nicholas.foulkes@kit.edu](mailto:nicholas.foulkes@kit.edu))

11

## 12 Abstract

13 Light represents a key environmental factor, which shapes the physiology and evolution of  
14 most organisms. Notable illustrations of this are reef-building corals (Anthozoa), which  
15 adapted to shallow, oligotrophic, tropical oceans by exploiting light from the sun and the  
16 moon to regulate various aspects of physiology including sexual reproduction, phototaxis and  
17 photosymbiosis. Together with the Medusozoa, (including jellyfish), the Anthozoa constitute  
18 the ancestral metazoan phylum cnidaria. While light perception in Medusozoa has received  
19 attention, the mechanisms of light sensing in Anthozoa remain largely unknown. Cnidaria  
20 express two principle groups of light-sensing proteins: opsins and photolyases/cryptochromes.  
21 By inspecting the genomic loci encoding these photoreceptors in over 35 cnidarian species,  
22 we reveal that Anthozoa have substantially expanded and diversified their photoreceptor  
23 repertoire. We confirm that, in contrast to Medusozoa, which retained one opsin class,  
24 anthozoans possess all three urmetazoan opsin classes. We show that anthozoans also evolved  
25 an extra sub-group (actinarian ASO-IIIs). Strikingly, we reveal that cryptochromes including  
26 CRY-IIIs are absent in Medusozoa, while the Anthozoa retained these and evolved an  
27 additional, novel cryptochrome class (AnthoCRYs), which contain unique tandem  
28 duplications of up to 6 copies of the PHR region. We explored the functionality of these  
29 photoreceptor groups by structure-function and gene expression analysis in the anthozoan  
30 model species *Exaiptasia pallida* (*Aiptasia*), which recapitulates key photo-behaviors of  
31 corals. We identified an array of features that we speculate reflect adaptations to shallow  
32 aquatic environments, moonlight-induced spawning synchronization and photosymbiosis. We  
33 further propose that photoreceptor complexity and diversity in Anthozoa reflects adaptation to  
34 challenging habitats.

35

36

## 37 **Introduction**

38 Light from both the sun and moon dominates the life of many organisms and has had a  
39 profound impact on their evolution. While the mechanisms underlying light sensing have  
40 been studied in a comparatively small group of animal models, little is known about the  
41 impact of light on the physiology and evolution of more ancestral metazoan groups such as  
42 the cnidarians. These are basal, non-bilaterian, eumetazoan animals divided into two major  
43 groups, the Anthozoa and the Medusozoa (Figure 1A; [1], which both exploit a complexity of  
44 sunlight and moonlight-based cues to regulate various aspects of their physiology and  
45 behaviour (Figure 1B). Notable examples of highly light-dependent cnidarians are reef-  
46 building corals and anemones (both Anthozoa; Figure 1A), many of which live in an  
47 evolutionary ancient symbiotic relationship with eukaryotic, photosynthetic dinoflagellates of  
48 the Symbiodiniaceae family [2, 3]. The symbionts use sunlight to provide essential  
49 photosynthetically-fixed nutrients to their hosts to support host survival in otherwise  
50 oligotrophic tropical oceans. In fact, the nutrient transfer from dinoflagellate symbionts to the  
51 reef-building corals powers the productivity of reef ecosystems, which are home to more than  
52 25% of all marine species [4]. The majority of these ‘photosynthetic cnidarians’ have a sessile  
53 lifestyle in shallow sunlit waters and are mobile only during early development at the larval  
54 stage (Figure 1B). Due to this almost ‘plant-like’ lifestyle, sessile cnidarians face similar  
55 challenges as true plants such as exposure to intense sunlight, which also bears the risk of  
56 temperature stress and UV-induced DNA damage. In addition, most cnidarians harness light  
57 from both the sun and moon to orchestrate gamete release during sexual reproduction,  
58 including the synchronous mass-spawning events of reef-building corals worldwide [5, 6].  
59 Other important photo-induced behaviours of cnidarians include phototaxis and diurnal  
60 migration [7-10]. Given the strong dependence of the cnidarian lifestyle upon environmental  
61 lighting conditions, a key question is: which mechanisms mediate these broad ranging effects  
62 of light? Given the ecological niches that cnidaria occupy, it is likely that their photoreceptors  
63 and light responsive systems would participate in temporally and spatially coordinating  
64 behaviour and physiology as well as combating the damaging effects of sunlight. However,  
65 with few exceptions including jellyfish eye evolution [11, 12], studies on cryptochrome  
66 function in relation to circadian rhythms in *Acropora* and *Nematostella* [13, 14], the light-  
67 induced gamete-release in *Clytia hemisphaerica* [15] and a study of opsin evolution in *Hydra*  
68 [16], the repertoire and function of cnidarian photoreceptors remains poorly understood.

69  
70 Two main groups of light sensing proteins exist in metazoans. Opsins are eumetazoan-  
71 specific 7-transmembrane G-protein-coupled receptors, which typically incorporate a retinal  
72 chromophore and appear to have evolved from ancestral metazoan hormone-responsive  
73 receptors [10, 17-19]. In most animal groups they have been shown to function as membrane-

74 bound photoreceptors that mediate visual as well as non-visual light sensing, and trigger  
75 intracellular signalling events upon detection of specific wavelengths. The second group,  
76 comprising photolyases (PLs) and cryptochromes (CRYs), is a set of highly conserved  
77 flavoproteins involved in harvesting light energy to drive the repair of DNA damage as well  
78 as regulating the circadian clock in response to light. Specifically, PLs enzymatically repair  
79 pyrimidine-pyrimidone (6-4) and cyclobutane pyrimidine dimer (CPD) DNA lesions  
80 generated by UV radiation. They were already present in the common ancestors of Bacteria,  
81 Archaea, and Eukarya and are classified according to the type of DNA damage that they  
82 repair ((6-4) PLs and CPD-PLs) [20-23]. CRYs, which generally lack photolyase enzyme  
83 activity, appear to have evolved independently several times from PLs later during evolution  
84 in the Eukarya [23-28]. CRY1s are directly light-sensitive and sometimes also referred to as  
85 *Drosophila*-type CRYs [29] while CRY2s (also called vertebrate-type CRYs) exhibit no light-  
86 dependent function. They instead regulate clock gene transcription in the negative limb of the  
87 circadian clock feedback loop [30, 31]. CRY-DASHs ((*Drosophila*, *Arabidopsis*,  
88 *Synechocystis*, Human)-type CRYs) are functionally intermediate between PLs and CRYs and  
89 considered photoreceptors with residual DNA repair activity [23, 32]. However, all PLs and  
90 CRYs share an amino-terminal photolyase-related (PHR) region that contains a DNA-binding  
91 photolyase domain (also called alpha/beta domain which binds 5,10-methenyltetrahydrofolate  
92 (pterin or MTHF)) and a flavin adenine dinucleotide (FAD) domain, which binds to a FAD  
93 chromophore [23].

94

95 In order to explore the function and evolution of these two photoreceptor protein groups in the  
96 cnidarian lineage, we have classified extant cnidarian photoreceptors using a detailed  
97 phylogenomics approach. Based on this phylogenetic analysis, we investigate the expression  
98 and regulation of cnidarian photoreceptors in the anthozoan symbiosis model *Exaiptasia*  
99 *pallida* (commonly *Aiptasia*) [33]. *Aiptasia* is widely used to investigate the molecular  
100 mechanisms underlying cnidarian-dinoflagellate symbiosis establishment and maintenance  
101 [34-38] as well as its breakdown, a phenomenon known as ‘coral bleaching’ [39]. Moreover,  
102 analogous to most corals, *Aiptasia* also exhibits synchronous, blue (moon) light induced  
103 gamete release [40] to produce motile larvae that have to find a suitable niche for their light-  
104 dependent lifestyle (Figure 1B). Here we reveal a large and highly diverse photoreceptor  
105 repertoire in Anthozoa, and in particular in *Aiptasia*, paving the way to dissecting  
106 photoreceptor evolution and function to reveal fundamental principles of how cnidarians  
107 adapt to their light-dominated environments.

108

109

110 **Results**

111 ***Opsin complexity in Cnidaria***

112 As a first step towards a better understanding of the evolution of the opsin gene family in  
113 cnidarians, we generated a detailed molecular phylogeny, based on RNA sequence data and  
114 gene structure analysis. Originally, only two types of opsins, the ciliary (c-opsins) and the  
115 rhabdomeric (r-opsins) were described [41]. The c-opsins serve as the main visual  
116 photoreceptors in vertebrates, while the r-opsins play the same role in invertebrates. Since  
117 then, taking advantage of an enormous increase in available sequencing data, new molecular  
118 phylogenies and functional studies, more opsin classes have been defined. To date, ten  
119 distinct opsin classes have been identified across all Metazoa, three of which, namely the  
120 cnidopsins as well as the Anthozoan-specific opsins I (ASO-I) and II (ASO-II) occur in  
121 cnidarians (Figure 2A; [42]). The cnidopsins are relatively well studied and are often  
122 expressed in a distinct tissue- and stage-specific manner. For example, cnidopsin expression  
123 has been studied in the light-sensitive cilia of jellyfish (Medusozoa) eyes, in the hydrozoan  
124 battery complex and more ubiquitously in sensory nerve cells [9, 11, 12, 43]. However, far  
125 less is known about the anthozoan-specific ASO-I and ASO-IIs; both of which are restricted  
126 to Anthozoa (including sea anemones and corals that lack comparable eye-like sensory  
127 organs) but are absent in the Medusozoa. Moreover, due to a lack of extensive taxon  
128 sampling, a sophisticated assessment of function and diversity for the ASO-I and ASO-II  
129 opsins has been lacking. To address this issue, we mined genomic data from 36 cnidarians (7  
130 Anthozoa and 29 Medusozoa). Our new, large-scale phylogeny resolves the ten previously  
131 identified distinct opsin classes including the three cnidarian types (Figure 2A). All cnidarians  
132 (Anthozoa and Medusozoa) possess cnidopsins, which are monophyletic and sister to the  
133 animal xenopsins. The monophyletic ASO-I group appears ancestral to all other opsins and  
134 has likely been lost secondarily, similar to the loss of ASO-II opsins in the Medusozoa  
135 (Figure 2A;[42]). Moreover, our extended analysis revealed that the ASO-II opsins comprise  
136 two distinct, previously not formally described sub-clusters (see Vöcking et al. (2017)). We  
137 noticed that one of these two clusters exclusively contains opsins from sea anemones  
138 (*Actiniaria*), while the second cluster contains genes from all Anthozoa including sea  
139 anemones and corals. This distinct split was confirmed using a second round of reciprocal  
140 BLAST searches and phylogenetic inference against a more extensive number of ASO-IIs  
141 using data from Picciani et al. (2018) (Figure 2B). Accordingly, we have named the  
142 *Actiniaria* (sea anemone)-specific cluster ‘actiniarian ASO-IIs’ while the second cluster  
143 remains ASO-IIs. Intron phase analysis corroborates the ASO-II and Actiniarian ASO-II split  
144 since we revealed that genes in both clusters have a single intron at distinct positions  
145 (Supplementary Figure 1A). Moreover, we observe that the ASO-I and ASO-II intron  
146 distribution is distinct from the ctenopsin and c-opsin intron distribution despite their  
147 common ancestry since there is a lack of any conserved homologous intron positions

148 (Supplementary Figure 1A). This suggests that the ancestral intron-less ASO-II gene  
149 duplicated and subsequently each gene acquired a distinct intron before the ASO-II sub-  
150 clusters further diversified.

151

152 Changes in amino acid sequence involving key residues is a hallmark of opsin evolution and  
153 functional diversification [17, 44-47]. To assess the overall sequence diversity of the opsins  
154 occurring in cnidaria, we used pairwise identity mapping of more than 500 opsins (including  
155 237 cnidarian opsins). We found that at the protein level most cnidarian opsins are indeed  
156 highly diverse (Supplementary Figure 2). For example, while the ancestral ASO-Is cluster  
157 tightly and form one distinct group with a highly similar amino acid composition, the  
158 cnidopsins and ASO-IIs are subdivided into various clusters which are interspersed with  
159 several classes of opsins associated with higher animals including, for example, vertebrate-  
160 specific c-opsins (Supplementary Figure 2). Opsin amino acid composition and photosensory  
161 function are highly correlated and specific amino acid residues interact with the chromophore  
162 to tune peak spectral sensitivities [44, 48]. Therefore, the high levels of diversity we observe  
163 in cnidarian opsins may reflect photosensory diversity rather than being the result of  
164 synonymous gene duplications that merely created functionally identical opsin paralogs.

165

166 Interestingly, we specifically noted that opsins within the two ASO-II clusters differ in one  
167 major functional amino acid. Typically, opsins contain a highly conserved glutamate residue  
168 at position 181 (E181), which stabilizes retinal, the light-sensitive chromophore forming a so-  
169 called protonated Schiff base (PSB) when bound to opsin. Light absorption triggers retinal  
170 *cis-to-trans* isomerization, which, in turn, results in opsin conformational changes that reveal  
171 a cytoplasmic G-protein binding site and thereby enables the activation of signalling cascades.  
172 Free retinal is maximally sensitive to UV light but its absorption maximum is shifted towards  
173 visible light when covalently bound to opsins, ensuring its maximal sensitivity lies within the  
174 visual spectrum [17]. However, while most actiniarian ASO-IIs, similar to the cnidopsins and  
175 ASO-Is, indeed have a glutamate [Q] at the equivalent position, all members of the  
176 anthozoan-wide occurring ASO-IIs sub cluster lack this conserved feature (Figure 2C;  
177 Supplementary Figure 1B). To date, E181 has been found to be conserved in all opsins [48,  
178 49] with the exception of vertebrate visual opsins where it occurs together with, or is replaced  
179 by E113 [17, 47, 50-53], a vertebrate-specific feature associated with even higher fidelity  
180 visual photoreception. Interestingly, one *Aiptasia* ASO-II (ASO-II.4) contains both E113 and  
181 E181 (Supplementary Figure 1B), suggesting that this presumed vertebrate-specific feature  
182 may also have arisen independently in some cnidarians and so may represent an example of  
183 convergent evolution conferring higher-fidelity photoreception [53]. Furthermore, these

184 specific amino acid differences are consistent with functional diversification during evolution  
185 of the ASO-II opsin group.

186

### 187 ***Life-stage, symbiotic state and tissue type-specific opsin expression in Aiptasia***

188 In the model species *Aiptasia*, we identified 18 distinct opsins: 4 cnidopsins  
189 (XP\_020899757.1, XP\_020913977.1, XP\_020904301.1, XP\_020897723.2), 2 ASO-Is  
190 (XP\_020902074.1, XP\_028515325.1) and 5 ASO-IIs (XP\_020903100.1, AXN75743.1,  
191 XP\_020897790.2, XP\_028514120.1, XP\_020909716.1) and 7 actiniarian ASO-IIs  
192 (XP\_020914799.1, XP\_020906239.1, XP\_020909580.1, XP\_020907384.1, XP\_020910007.1,  
193 XP\_020893775.2, XP\_020914907.2). See also: Supplementary File 1. To assess whether this  
194 broad opsin repertoire is actively expressed and if so, during which life stages, we compared  
195 opsin expression levels using publicly available *Aiptasia* RNA-Seq data [34, 54]. We found  
196 that with one exception, all *Aiptasia* opsins are ubiquitously expressed in both larvae and  
197 adults with expression levels of some opsins elevated specifically in adults and others during  
198 larval stages suggesting the existence of opsins with larval- and adult-specific functions  
199 (Figure 3A). Likewise, opsin expression varies depending on the symbiotic state (Figure 3B).  
200 For example, one opsin from the actiniarian-specific ASO-II group (ASO-II.12, dark green),  
201 and two from the ASO-II group (ASO-II.7 and ASO-II.11, yellow) show significantly higher  
202 expression levels in symbiotic anemones when compared to their aposymbiotic (non-  
203 symbiotic) counterparts. This is consistent with previous findings that symbiotic association  
204 influences photo-movement in *Aiptasia* [8] and suggests that host perception of  
205 environmental light by opsin-mediated light-sensing may change in response to symbiosis, for  
206 example to adjust the levels of sunlight exposure for optimal photosynthesis rates.

207

208 Opsins have been implicated in ‘sensing’ moonlight to synchronize gamete release in corals  
209 [5, 55]. Specifically, it is predicted that physiologically relevant blue shifts in the irradiance  
210 spectrum measurable during twilight on several days before and after the full moon acts as a  
211 trigger for a potential opsin-mediated dichromatic visual system where readouts from a blue-  
212 and red-light sensitive opsin are integrated to induce spawning [6]. Accordingly, exposure for  
213 5 nights to LED-based blue light has been shown to specifically induce synchronized  
214 spawning in *Aiptasia* [40]. By analogy with the jellyfish *Clytia hemisphaerica* in which the  
215 opsin relevant for spawning is specifically expressed in the gonadal tissue [15], we therefore  
216 asked whether any of the opsin genes present in *Aiptasia* showed a gonad-specific expression  
217 pattern (Supplementary Figure 3). By using qPCR analysis, we revealed that *Aiptasia* ASO-  
218 II.3 is indeed expressed in a tissue-specific manner and significantly up-regulated in  
219 mesenteries when compared to the tentacles (Figure 3C). Thus, *Aiptasia* ASO-II.3 represents  
220 a candidate opsin that may be involved in spawning induction in this species.

221

222 ***Novelty in the cnidarian photolyase and cryptochrome repertoire***

223 Another major group of light-sensing proteins in animals are the CRY and PL flavoproteins,  
224 however, to date their phylogeny in cnidarians has not been assessed in detail. To address this  
225 issue, we next used phylogenomic analysis and considered the position of conserved introns.  
226 We revealed that while they possess CRY-DASH, CPD-II PLs and (6-4) PLs, CPD-Is and  
227 CRY-Is are absent from all cnidarians (Figure 4A, Supplementary Figure 4A). Furthermore,  
228 while CRY-IIs are encountered only in the subphylum Anthozoa, strikingly CRYs are  
229 completely absent from the Medusozoa that are represented by 29 taxa in our analysis  
230 (Supplementary File 5).

231

232 Interestingly, we have identified two distinct CRY groups in Anthozoa. One is a sister group  
233 to ‘animal CRY-IIs’ that we named anthozoan CRY-IIs. Due to their phylogenetic position at  
234 the base of animal CRY-IIs we speculate these are likely to be involved in circadian clock  
235 function [29, 56, 57]. However, a second, novel CRY group appears to be basal to both (6-4)  
236 PLs and ‘animal CRY-IIs’ (but distinct from CRY-Is and sponge CRYs). We thus named this  
237 group Anthozoan-specific CRYs (AnthoCRYs) (Figure 4A and 4B). Previous, preliminary  
238 analysis of both cryptochrome groups lead to them being classified within the animal CRY-  
239 IIs, presumably due to a lack of cnidarian taxa representation in associated phylogenies [13,  
240 58, 59]. Our study now clarifies their phylogenetic position and proposes their name based on  
241 identity. Thus, similar to the situation for the opsin genes, the Anthozoa possess a more  
242 extensive repertoire of CRYs when compared with the Medusozoa.

243

244 A hallmark of PLs and CRYs is the PL-homologous region (PHR region) that contains a N-  
245 terminal DNA-binding photolyase domain (also called the alpha/beta domain) and a C-  
246 terminal FAD chromophore binding domain [21, 22, 57]. All PLs and CRYs described to date  
247 contain a single PHR region. Strikingly, however, here we reveal that AnthoCRYs contain up  
248 to six tandemly repeated PHR regions (Figure 4B). We confirmed this PHR region  
249 duplication independently in the sea anemone *Aiptasia* by PCR and sequencing (Figure 4C) of  
250 the *Aiptasia* AnthoCRY.1 cDNA. Such a PHR region expansion has not been described for  
251 any PL or CRY to date. This expansion occurs across all Anthozoa including non-symbiotic  
252 and symbiotic members indicating that the tandem duplication of PHR domains in Anthozoan  
253 CRYs might serve a common purpose in this animal group. Interestingly, it appears to be  
254 absent from *Nematostella*.

255

256 ***Light regulated CRY gene expression in Cnidaria***

257 We next wished to investigate the functionality of these flavoprotein genes in terms of their  
258 regulation following light exposure. In many animal groups the expression of CRY and PL  
259 genes is induced upon exposure to light as a key mechanism to regulate the circadian clock or  
260 to upregulate DNA repair capacity in response to prolonged sunlight exposure. Consistently,  
261 in *Nematostella* three CRYs have been reported, two of which are upregulated in response to  
262 light [59]. Similarly, at least two different CRYs (Cry1a (XP\_001631029) and Cry1b  
263 (XP\_001632849)) are expressed in a light dependant manner in the coral *A. millepora* [13]. In  
264 the sea anemone *Aiptasia diaphana* two CRYs were identified (without accession numbers)  
265 and shown to be expressed rhythmically in the presence of a day-night cycle [60]. We  
266 therefore explored to which extent light regulates the 8 different *Aiptasia* PL and CRY genes  
267 that we identified (2 CPD\_II isoforms (XP\_020910442.1, XP\_020910516.1), 1 CRY-DASH  
268 (XP\_020903321.1), 2 (6-4) PL isoforms (XP\_020915076.1, XP\_020915067.1), 1 Anthozoan  
269 CRY (XP\_020904995.1) and 2 AnthoCRYs (XP\_020902079.1, XP\_020917737.1; see also:  
270 Supplementary File 2). With the exception of AnthoCRY.2, where mRNA levels are  
271 undetectable in *Aiptasia* larvae, we showed that all CRY and PL genes are generally  
272 ubiquitously expressed in both *Aiptasia* larvae and adults (Supplementary Figure 4B). We  
273 next adapted *Aiptasia* for 4 days to constant darkness and then exposed them for a period of 8  
274 hours to light, sampling at 2-hours intervals. Our results revealed that the expression of  
275 *Aiptasia* PLs and CRYs was differentially affected by light exposure. Specifically, *Aiptasia*  
276 CPD-II, *Aiptasia* DASH-CRY and *Aiptasia* (6-4) PL were largely unresponsive to light  
277 treatment (Figure 5A to 5C). In contrast, AnthoCRYs and CRY-II expression was rapidly  
278 induced upon exposure to light (Figure 5D to 5F).

279

280 A light-inducible expression pattern may be the consequence of acutely light-driven gene  
281 expression or alternatively of regulation by the circadian clock that is also likely to be  
282 synchronized during the period of light exposure. To distinguish between these two  
283 possibilities, we tested AnthoCRY and CRY-II expression by exposing *Aiptasia* to light-dark  
284 (LD) cycles and then transferring animals to constant darkness (DD). Clock regulation would  
285 be revealed by the appearance of rhythmic expression under an LD cycle that would persist  
286 following transfer to constant darkness. Therefore, samples were prepared at 6 hours intervals  
287 during either exposure to an LD cycle or immediately following transfer from LD to DD  
288 conditions and then CRY gene expression was assayed by qPCR. Under LD conditions we  
289 observed rhythmic expression with elevated expression during the light period, peaking at 8  
290 hours after lights on, and then decreasing during the dark period, with a trough at 8 hours after  
291 lights off (Figure 5G to 5I). In contrast, immediately upon transfer to DD conditions,  
292 rhythmic expression was absent, showing that changes in CRY gene expression are indeed  
293 light-, rather than clock-driven (Figure 5G to 5I).



294

295 We have previously studied the mechanisms underlying light-driven gene expression of  
296 cryptochromes and photolyases in vertebrates [61, 62]. We revealed a conserved role for  
297 light-induced transcription of these genes, mediated by the D-box element, an enhancer that  
298 has also been associated with circadian clock regulation together with the E-box enhancer  
299 [63]. We therefore tested whether D-box or E-box enhancer elements might be encountered  
300 within the promoter regions of the various *Aiptasia* CRY and PL genes. By scanning the  
301 genomic regions 1 kb upstream of the respective gene START codon (ATG), single D-box  
302 enhancers were identified in 6-4 PL and CPD-II, two genes which were not induced upon  
303 exposure to light. However, in the case of the light-inducible AnthoCRY and CRY-II genes  
304 we identified several PAR/bZIP binding sites (D-boxes; Figure 5J), interestingly, located  
305 proximally to E-box enhancers. Furthermore, consistent with the existence of functional D-  
306 box regulatory pathways in Anthozoa, we show that *Aiptasia* possesses 4 putative orthologs  
307 of the PAR/bZIP TFs family (three TFs basal to Hepatic leukemia factor (HLF)-type  
308 PAR/bZIP TFs and one DBP (D-box Binding PAR/bZIP) TF (Supplementary Figure 5) which  
309 have been shown to bind to and regulate transcription from the D-box enhancer in vertebrates  
310 [64-66].

311

## 312 **Discussion**

313 Reef-building corals and sea anemones represent critically important members of the  
314 ecosystems in shallow, oligotrophic, tropical oceans. Their physiology is dominated by light.  
315 They exploit sunlight and moonlight to regulate their sexual reproduction, phototaxis and  
316 photosymbiosis. Furthermore, there exposure to sustained high levels of sunlight puts them at  
317 particular risk from elevated levels of DNA damage. In order to explore the molecular  
318 mechanisms linking light with anthozoan biology, we present the first detailed phylogenetic  
319 analysis of two major light sensing protein groups: the opsins and the  
320 cryptochrome/photolyase flavoproteins. Within the broader context of the ancestral metazoan  
321 phylum, the cnidaria, we reveal that the Anthozoa have substantially expanded and diversified  
322 their photoreceptor repertoire compared with the Medusozoa. This striking observation raises  
323 several fundamental questions concerning how this expanded photoreceptor capacity may be  
324 linked with adaptation to their extreme, shallow water environments.

### 325 ***The origins of opsin diversification in the Cnidaria***

326 The last common ancestor of the cnidaria and bilateria possessed three classes of distinct  
327 opsins giving rise to the cnidopsins, ASO-Is and ASO-IIs, yet the Medusozoa only retained  
328 the cnidopsins. The extant Anthozoa on the other hand possess multiple ASO-Is and

329 substantially expanded and diversified the ASO-IIs. The ASO-I is the most ancient opsin  
330 class in the metazoan lineage and represents phylogenetically and, based on protein sequence,  
331 a coherent group, but to date its function is entirely unknown. Interestingly, the ASO-IIs are  
332 much more diverse at the sequence level and share a common ancestry with the tetraopsins  
333 and r-opsins as well as to the cnidopsins, xenopsins, ctenopsins and the well-studied c-opsins  
334 responsible for visual photoreception in vertebrates. This suggests that an urmetazoan animal  
335 possessed an ancestral but now extinct opsin that early in opsin evolution gave rise to multiple  
336 opsin classes. Frequent lineage-specific gains and losses then shaped the broad repertoire of  
337 light-sensing mechanisms and opsin classes that we see to date [12, 42, 67]. This capacity for  
338 diversity is still reflected by the novel ASO-II sub-cluster that is restricted to anthozoan  
339 anemones. Interestingly, if cnidopsins are indeed early xenopsins as suggested by our study  
340 and also Ramirez et al. (2016) and if ASO-IIs are indeed sister to the c-opsins as suggested  
341 here and by Ramirez et al. (2016) and Vöcking et al. (2017) the cnidarians may be the only  
342 animals where xenopsins and c-opsins (or at least their direct ancestral cousins) co-occur.

343 In accordance with the notion that ASO-IIs play an important role in the adaptation of  
344 Anthozoa, to their environments, we find that the highly conserved E181 amino acid residue  
345 is absent in the ASO-IIs suggesting that this key position has been modified, possibly to shift  
346 the ASO-IIs wavelength specificity more towards blue light (shorter wavelengths) absorption  
347 which may be a specific adaptation to aquatic marine environments where the penetration of  
348 longer wavelengths is reduced with increasing water depth [68, 69]. Indeed, by using  
349 computational modelling based on a vertebrate opsin crystal structure, it was shown that loss  
350 of E181 causes a light absorption shift of more than 100 nm towards blue light [70]. In the  
351 future, a functional analysis of the wavelength specificities of anthozoan opsins will provide  
352 fundamental new insight into the ability of basal animals to exploit various light cues.

353

#### 354 ***Adaptations to light-induced sexual reproduction***

355 Coral sexual reproduction is a vital process for species viability. It is key for genetic diversity,  
356 dispersal by motile larvae and affects the abundance of juvenile corals to replenish aging  
357 coral communities. However, for sessile Anthozoa such as reef-building corals, achieving  
358 efficient fertilization rates is challenging because it occurs effectively only a few hours after  
359 gamete release by the parental colonies and gametes are easily diluted within the open space  
360 of the ocean. Accordingly, corals have evolved a precise spawning synchrony within  
361 populations integrating various environmental cues including temperature and solar irradiance  
362 to set the exact month, lunar cycles to set the exact night and circadian light cues to set the  
363 exact hour (see [71] and references therein). In this context it is worth noting that *Aiptasia*  
364 recapitulates key aspects of light-induced synchronized spawning observed in corals. Under

365 laboratory conditions, delivery of LED-based blue-light for 5 consecutive nights, simulating  
366 full moon, triggers gamete release peaking 9-10 days after the last exposure to blue light. This  
367 effect is wavelength-specific as it works effectively with light at 400-460nm, while white  
368 light is ineffective [40]. Gamete release occurs ~5.5h after ‘sunset’ and after release,  
369 fertilization efficiency drops from 100% to ~25% within the first hour [72] underlining the  
370 need for precise timing of sexual reproduction within the Anthozoa.

371

372 Opsins have been implicated as light-sensors to trigger spawning in corals [5, 6, 73].  
373 Moreover, a functional relationship between a light-induced, opsin-dependent spawning  
374 mechanism has been shown in a medusozoan, the jellyfish *Clytia hemispherica*. This elegant  
375 study found that a gonadal opsin senses blue light to trigger spawning upon dark-light  
376 transitions [15]. Thus, it is tempting to speculate that *Aiptasia* ASO-II.3, which is also  
377 expressed at elevated levels in gonads (Figure 3C) may serve a similar function for  
378 synchronous gamete release in this anthozoan species. *Aiptasia* represents a tractable model to  
379 experimentally dissect the mechanisms of light-induced sexual reproduction in Anthozoa  
380 including the integration of lunar cycles as well circadian periodicities to trigger gamete  
381 maturation and synchronous release. A mechanistic understanding of how Anthozoa have  
382 adapted the timing of sexual reproduction to their environments, together with analysing how  
383 environmental changes affect the spawning synchronicity within the ecosystem, is key to  
384 direct future research and conservation efforts [71].

385

### 386 ***Adaptations to increased UV-induced DNA damage***

387 Our results have also revealed significantly more diversity of the CRY/PL flavoproteins in the  
388 Anthozoa compared with the Medusozoa. While both contain CRY-DASH, CPD-II PLs and  
389 (6-4) PLs, Anthozoa also have two extra CRY classes (AnthoCRYs and Anthozoan CRYIIs),  
390 which are absent from Medusozoa. Thus, strikingly, the Medusozoa completely lack CRY  
391 genes. The AnthoCRYs represent a phylogenetically well-supported but previously  
392 unidentified, anthozoan-specific CRY family, which resolves at the base of animal CRY-IIs  
393 and (6-4) PLs. A hallmark of all CRY/PL proteins analysed to date is the highly conserved  
394 structure of the PHR domain consisting of a N-terminal domain and a FAD domain.  
395 However, here we reveal that the anthozoan AnthoCRYs exhibit an extensive and  
396 unprecedented PHR region duplication. Tandemly repeated PHR regions have never been  
397 observed before in any other eukaryotic or prokaryotic species. While the structure and  
398 function of the PHR has been studied in great deal in the context of PLs revealing its light-  
399 dependant DNA-repair function, the role of the PHR region in the CRYs remains rather  
400 unclear [21]. Nevertheless, until this current report, only single PHR regions have been

401 scrutinized in PL or CRY proteins. The identification of tandem duplication of the PHR  
402 region in Anthozoa provides some tantalizing clues as to the functional significance of this  
403 domain. It is tempting to speculate that AnthoCRYs, which are clearly distinct from  
404 vertebrate CRY-IIIs and CRY-Is and sister also to (6-4) PLs, have not yet lost their light-  
405 dependant DNA repair activity and in fact have evolved in the Anthozoa to provide higher  
406 UV-damage repair capacities reflected by their domain duplications. Furthermore, the  
407 observation that both AnthoCRY.1 and AnthoCRY.2 exhibit light-inducible expression would  
408 also be consistent with these genes playing a key role in the response to intensive sunlight  
409 exposure, a threat that sessile corals likely face on a daily basis in their sunlit tropical habitats.

#### 410 *Adaptations of the circadian clock during cnidarian evolution*

411 Transcriptional control of gene expression in response to light serves as a central regulatory  
412 element within the circadian clock core mechanism. This enables regular adjustment of the  
413 phase of the circadian clock to match that of the environmental day-night cycle. In non-  
414 mammalian vertebrates D-boxes mediate light-inducible gene expression, alone or in  
415 combination with other enhancers such as the E-box [61-63]. Furthermore, in fish, D-boxes  
416 also activate transcription in response to oxidative stress and UV exposure [64]. Thus, in the  
417 majority of vertebrates, D-boxes coordinate the transcription of a set of genes that includes  
418 certain clock genes as well as genes involved in the repair of UV-damaged DNA [61, 64] to  
419 constitute a cellular response to sunlight exposure. This contrasts with the situation of  
420 mammals where D-boxes exclusively direct clock-controlled rhythms of gene expression  
421 [74]. Therefore, the discovery of an enrichment of proximally spaced E and D-box enhancer  
422 elements in the promoters of the light inducible AnthoCRY genes supports the view that the  
423 D-box plays an ancestral sunlight-responsive role. Furthermore, this may also predict a  
424 function for AnthoCRYs in the complex cellular response to the damaging effects of sunlight  
425 which may involve responses to visible and UV light as well as oxidative stress.

426

427 CRYs are key regulators of the circadian clock in animals. Together with the Period proteins  
428 they serve as negative regulators within the core transcription-translation feedback loop  
429 mechanism [30]. Based on previous studies of plant and animal circadian clocks, it can be  
430 predicted that clock function is of fundamental importance for many anthozoan species. For  
431 example, the adaptation of the host cell physiology to the daily cycles of photosynthetic  
432 activity of the dinoflagellate symbionts as well as the sessile lifestyle of Anthozoa is likely to  
433 rely heavily on this endogenous timing mechanism that anticipates the course of the day-night  
434 cycle. This may well account for the conservation of CRY function in the Anthozoa. The  
435 absence of CRY in Medusozoa suggests that in these species, circadian clocks may be based  
436 upon fundamentally different mechanisms. Interestingly, canonical circadian clock genes

437 were previously reported to be absent in *Hydra* and possibly all Medusozoa [7, 73, 75, 76].  
438 However, whether medusozoan species have evolved alternative mechanisms to control  
439 rhythmic behaviour and physiology, or whether they may have actually lost circadian clock  
440 function represents a fascinating topic for future investigation.

441

#### 442 ***The origins of photoreceptor diversification***

443 One key difference between the Anthozoa and Medusozoa is that Medusozoa have a free-  
444 swimming medusa phase during their lifecycle, while Anthozoa do not. Instead, Anthozoa are  
445 typically sessile animals, which are only motile during larval stages (Figure 1A). Possibly  
446 connected with this fundamental difference is that the Anthozoa lack eyes. Thus, we speculate  
447 that the evolution of relatively sophisticated eye-like structures based on light-sensitive cilia  
448 expressing cnidopsins allows for the integration of various light cues simultaneously in  
449 Medusozoa. Instead, in the Anthozoa the repertoire of non-visual opsins expanded in order to  
450 perceive light in different photic environments and during distinct life stages. This expansion  
451 could allow fine-tuning of animal physiology and behaviour including gamete release and  
452 phototaxis as well as optimizing conditions for their photosynthetic symbionts. Another  
453 striking example of how the expansion and sequence diversification of opsins allows  
454 adaptation to specific environments has recently been elucidated in deep-sea fish. While  
455 classically all vertebrates rely on only a single rod opsin rhodopsin 1 (RH1) for obtaining  
456 visual information in dim light conditions, some deep-sea fish have independently expanded  
457 their single RH1 gene to generate multiple RH1-like opsins that are tuned to different  
458 wavelengths of light by modulating key functional residues [44].

459

460 Our demonstration that eighteen distinct opsins and eight distinct PLs and CRYs are  
461 expressed in *Aiptasia*, in either larval or adult stages, in symbiotic or aposymbiotic animals, in  
462 a tissue-specific manner and in some cases, in a light inducible manner suggests that  
463 symbiotic anthozoans possess a remarkable, functional diversity in their photoreception  
464 mechanisms. The augmented complexity of photoreceptors in the Anthozoa is likely due to  
465 gene loss in the Medusozoa as well as to continued gene expansion and diversification within  
466 the Anthozoa and is indicative of distinct light-sensing mechanisms associated with different  
467 lifestyles. It may well be that the increased photoreceptor diversity of Anthozoa including  
468 corals and sea anemones represents an essential adaptation to their predominantly sessile  
469 lifestyle. Ultimately, complex light sensing mechanisms may permit the integration of sun  
470 and moon light to regulate physiology and behaviour, and to facilitate adaptation to their  
471 challenging environments: shallow, highly sunlit, tropical oceans where food is scarce and  
472 there is an enhanced risk of UV-induced DNA damage (Figure 1B). However, to date, no  
473 anthozoan-specific photoreceptor has been functionally characterized. Here we have

474 generated an essential framework to experimentally analyse this diverse repertoire of non-  
475 visual photoreceptors using *Aiptasia* as a tractable model. A functional characterization of  
476 photoreceptors to uncover the mechanisms of light-sensing of cnidarians will provide  
477 profound new insight into the basic principles whereby metazoans adapt to light-dominated  
478 environments and how distinct lifestyles shape their photoreceptor repertoires.

479

## 480 **Materials and Methods**

### 481 ***Aiptasia* culture and spawning**

482 *Aiptasia* stocks were cultured as described [40]. Briefly, animals were reared from pedal  
483 lacerates for at least 6 months. For the spawning experiments, animals with a pedal disc  
484 diameter of 1 cm were separated into individual, small-sized, food-grade translucent  
485 polycarbonate tanks (GN 1/4– 100 cm height, #44 CW; Cambro, Huntington Beach, USA)  
486 filled with artificial seawater (ASW) (Coral Pro Salt; Red Sea Aquatics Ltd, Houston, USA or  
487 REEF PRO; Tropic Marin, Switzerland) at 31-34 ppt salinity at 26°C. They were fed with  
488 *Artemia salina* nauplius larvae 5 times a week during the entire experimental period. ASW  
489 was exchanged twice per week and the tanks were cleaned using cotton tipped swabs as  
490 required.

491

### 492 ***Sampling regimes***

#### 493 *Circadian rhythmicity of CRY/PL expression*

494 Firstly, *Aiptasia* polyps were adapted for 4 days to constant darkness and then exposed to  
495 light from white fluorescent bulbs with an intensity of  $\sim 20\text{-}25 \mu\text{mol m}^{-2} \text{s}^{-1}$  of  
496 photosynthetically active radiation (PAR), as measured with an Apogee PAR quantum meter  
497 (MQ-200; Apogee, Logan, USA) for a period of 8 hours, sampling at 2-hour intervals.  
498 Additionally, *Aiptasia* polyps were exposed to light-dark (LD, 12 h:12 h) cycles and then  
499 transferred to constant darkness (DD), sampling at 2, 8, 14 and 20 hours (LD) and 26, 32, 38  
500 and 44 hours (DD).

501

### 502 **Computational methods**

#### 503 *Identification of CRY, PL and opsin photoreceptors and PAR/bZIP transcription factor* 504 *homologs*

505 Potential CRY, PL and opsin sequences were recovered from *Aiptasia* genomic data (NCBI  
506 Bioproject PRJNA261862; [54]) by searching for annotation keywords and BLAST search  
507 using specific query sets. For opsins we used bovine (P51490), *Acropora palmata* (L0ATA4),  
508 *Carybdea rastonii* (B6F0Y5), honeybee (B7X752) and *Clytia hemisphaerica* (A0A2I6SFS3)  
509 opsins. For PLs and CRYs queries we used a set of previously published well-defined  
510 CRY/PL proteins, which we expanded to include known sponge and anthozoan CRYs [58,

511 77]. A set of known vertebrate PAR/bZIP transcription factors (TFs) were used as query sets  
512 to identify *Aiptasia* PAR/bZIP homologues using BLAST searches. The longest ORFs from  
513 recovered putative opsin genes were translated and aligned with the query sequences using  
514 ClustalW (GONNET,  $goc = 3$ ,  $gac = 1.8$ ). For opsins, sequences, which did not contain lysine  
515 K296, which is essential and indicative of chromophore binding, were excluded. For *Aiptasia*  
516 genes, we noticed that some of the associated gene models contained Ns (resulting in Xs in  
517 their amino acid sequences). Thus, we verify existing gene models by mapping reads from  
518 published short read RNA-seq libraries (Adult-apo: SRR1648359, SRR1648361,  
519 SRR1648362; Adult-intermediate: SRR1648363, SRR1648365, SRR1648367, SRR1648368;  
520 Adult-sym: SRR1648369, SRR1648370, SRR1648371, SRR1648372; Larvae-apo:  
521 SRR1648373, SRR1648374; Larvae-sym: SRR1648375, SRR1648376) to these gene models  
522 using HiSAT2 (<https://ccb.jhu.edu/software/hisat2/index.shtml>) at standard settings [78].  
523 Uniquely mapped reads were extracted using samtools 1.2 and sequences then manually  
524 curated prior to alignment and phylogenies (Supplementary Files 1-3).

525

#### 526 *Phylogenetic analyses*

527 A custom in-house BLAST database comprising more than 70 eukaryotic genera including  
528 *Nematostalla vectensis*, *Pocillopora*, *Stylophora*, *Orbicella*, *Acropora millepora*, *A. digitifera*,  
529 *Exaiptasia pallida* (Cnidaria, Anthozoa), *Abylopsis tetragona*, *Aegina citrea*, *Agalma*  
530 *elegans*, *Alatina alata*, *Atolla vanhoeffeni*, *Aurelia aurita*, *Calvadosia cruxmelitensis*,  
531 *Cassiopea xamachana*, *Chironex fleckeri*, *Chrysaora fuscescens*, *Clytia hemisphaerica*,  
532 *Craseoa lathetica*, *Craspedacusta sowerbyi*, *Craterolophus convolvulus*, *Cyanea capillata*,  
533 *Ectopleura larynx*, *Haliclystus sanjuanensis*, *Hydractinia echinata*, *H. polyclina*, *Hydra*  
534 *oligactis*, *H. viridissima*, *H. vulgaris*, *Leucernaria quadricornis*, *Nanomia bijuga*, *Physalia*  
535 *physalis*, *Podocoryna carnea*, *Stomolophus meleagris*, *Tripedalia cystophora*, *Turritopsis sp*  
536 *SK-2016* (Cnidaria, Medusozoa), *Aplysia californica* (Mollusca), *Amphimedon queenslandica*  
537 (Porifera), *Caenorhabditis elegans* (Nematoda), *Drosophila melanogaster* (Arthropoda),  
538 *Homo sapiens*, *Mus musculus*, *Danio rerio*, *Xenopus laevis* (all Vertebrata), *Monosiga*  
539 *brevicollis* (Choanoflagellate), *Pleurobrachia bachei* (Ctenophora), *Saccoglossus*  
540 *kowalevskii* (Hemichordata), *Strongylocentrotus purpuratus* (Echinodermata),  
541 *Saccharomyces cerevisiae* (Fungi), *Toxoplasma gondii*, *Plasmodium falciparum*, *Perkinsus*  
542 *marinus*, *Tetrahymena thermophila* (all Alveolata) and *Trichoplax adherens* (Placozoa) were  
543 used to generate a CRY/PL dataset for phylogenetic analysis. The majority of cnidarian  
544 sequences were obtained from published transcriptomes [79], but manually curated and  
545 translated in KNIME using in-house workflows comprising EMBOSS *getorf*. All other  
546 sequences were obtained from NCBI. For opsin phylogenies existing datasets were modified  
547 replacing *Exaiptasia* sequences with our newly verified *Aiptasia* opsin set [15, 42]. Outgroups

548 were defined according to Vöcking et al. (2017) comprising several GPCR receptor family  
549 members (melatonin, octopamine, serotonin and adrenergic receptors) and Trichoplax opsin-  
550 like sequences, which all belong to class  $\alpha$  rhodopsin-like GPCRs. For the detailed analysis of  
551 the ASO-II subtypes, additional ASO-II candidates were identified from the same database  
552 used for CRY/PL phylogenies using the previously identified *Aiptasia* ASO-IIs as query.  
553 Longest ORFs from recovered putative *Aiptasia* PAR/bZIP genes were translated and aligned  
554 to query sequences comprising multiple metazoan PAR/bZIPs and a CEBP (CCAAT-  
555 enhancer-binding proteins) outgroup. In all cases sequences were aligned using ClustalW  
556 (GONNET, goc: 3, gec: 1.8). Automated trimming was performed using trimAI using  
557 standard parameters [80]. Unstable leaves were identified and excluded using phyutilities  
558 with “-tt 100” settings [81]. Best-fitting amino acid substitution models were determined  
559 using PROTTEST3 (-JTT -LG -DCMut -Dayhoff -WAG -G -I -F -AIC -BIC;  
560 <https://github.com/ddarriba/prottest3>; [82]) and iqTree’s ModelFinder (-m MF -msub nuclear  
561 -nt AUTO; [83]). Maximum-likelihood trees were generated using iqTree (opsins: -m LG+G -  
562 bb 10000 -bnni -nt AUTO -alrt 10000 -abayes; CRY/PLs: -m LG+R6 -bb 10000 -bnni -nt  
563 AUTO -alrt 10000 -abayes; [84]). Bayesian inference trees were calculated using MrBayes  
564 (lset rates=gamma ngammacat=5; prset brlenspr=unconstrained:gammadir(1.0,0.1,1.0,1.0)  
565 aamodelpr=fixed(lg);mcmc ngen=1100000 samplefreq=200 printfreq=1000 nchains=4  
566 temp=0.2 savebrlens=yes; starttree=random;set seed=518; sumt burnin=500; sump  
567 burnin=500; [85]). For opsin and CRY/PL phylogenies support values of resulting ML and  
568 Bayesian analyses were combined using Treegraph2.14.0-771 [86]. Resulting trees were  
569 finalized using FigTree 1.4.4 (<http://tree.bio.ed.ac.uk/software/figtree/>) and Adobe Illustrator  
570 CC 2018. All alignments, tree files and accession numbers are provided in nexus format  
571 (Supplementary File 4-6).

572

### 573 *Domain structure analysis, sequence logos and duplicate domain confirmation*

574 The domain structures of the different CRYs and opsins were predicted using InterProScan  
575 v5.44 in Geneious R10 (Biomatters). Sequence logos were generated using Weblogo [87].  
576 Sequencing a region spanning exon 7 and 8, which encode the C-terminal end of the FAD-  
577 binding domain of the AnthoCRY.1 PHR region 1 and the start of the N-terminal sequence of  
578 the AnthoCRY.1 PHR region 2 confirmed the presence of the PHR region tandem  
579 duplication. Here, RNA (as cDNA) and gDNA were PCR amplified using exon-specific  
580 primers (Supplementary Table 1), cloned into pJET2.1 and then Sanger sequenced.  
581 Alignment of sequenced fragments confirmed that the genomic sequence contains an intron  
582 and that the genomic and transcript sequences of AnthoCRY.1 span two individual PHR  
583 regions and that both are expressed.

584



585 *Conserved intron structure analysis*

586 Reference sequences were chosen at random to represent the canonical exon-intron structure  
587 of the respective Opsin/CRY/PL types. Reference and *Aiptasia* opsin gene models were  
588 generated using WebScipio [88] and conserved introns were identified using GenePainter 2.0  
589 [89].

590

591 *Expression quantification of PLs, CRYs and opsins*

592 We analysed expression of the CRY, PL and opsin genes using the same published short read  
593 RNA-seq libraries that we used for gene model verification comprising data for adult and  
594 larval life stages from aposymbiotic and symbiotic states including 2-4 biological replicates  
595 per sample treatment [90]. The ultra-fast, bias-aware short read mapper Salmon [91] and in-  
596 house R scripts were used to generate a TMM normalised expression quantitation matrix  
597 across all conditions and samples. Average expression data for adult and larval *Aiptasia* was  
598 used irrespective of their symbiotic state to analyse the differential developmental expression  
599 of CRYs and opsins. To compare the effect of symbiosis, the average expression in symbiotic  
600 and aposymbiotic adults was compared. Graphs were drawn and significance levels were  
601 determined using a multiple t-test in Prism 8.1.1 (GraphPad).

602

603 *D-box and E-box searches*

604 Potential PAR/bZIP binding sites in the genomic region 1kb upstream of the CRY/PL TSS  
605 were identified using MATCH 1.0 Public (<http://gene-regulation.com/pub/programs.html>)  
606 (Binding sites for Hlf (TransFac ID: T01071) and VBP (TransFac ID: T00881) were  
607 considered D-Boxes). The identified potential sites were aligned to the canonical D-Box  
608 elements identified in zebrafish using ClustalW (GONNET, goc: 3, gec: 1.8). Statistically  
609 overrepresented E-box motifs were identified in the same genomic regions using Clover [92]  
610 and a library of 9 TF binding motifs including several known (MITF and USF TF binding  
611 motifs) and one manually generated E-box motif. An approx. 6Mbp *Aiptasia* genomic  
612 scaffold (Genbank Accession NW\_018384103.1) was used as a background sequence.

613

614 **Gene expression**

615 *RNA extraction and qPCR*

616 For circadian rhythmicity qPCR analysis, polyps were macerated in Trizol at a concentration  
617 of 500mg per ml, snap frozen in liquid nitrogen and stored at -80 °C. Total RNA was  
618 extracted as described, but replacing phenol-chloroform with Trizol [37]. For determination  
619 of opsin expression levels in mesentery and tentacle tissues, a number of adult male *Aiptasia*  
620 were anesthetized in 7% MgCl<sub>2</sub> (w/v) in ASW (1:1) for 1 hour and then transferred into  
621 Methacarn fixative (6:3:1 methanol:chloroform:acetic acid). Following two Methacarn

622 changes in the first hour the samples were then incubated for 48 hours at RT. Individual  
623 polyps were then transferred into PBS and dissected to separate tentacle and mesentery  
624 tissues. Total RNA was extracted from dissected tissue samples as described in Hambleton et  
625 al. (2020) replacing phenol-chloroform with Trizol. In all cases cDNA was synthesised with 1  
626 µg of total RNA per sample using a ReadyScript cDNA Synthesis Mix (Sigma-Aldrich).  
627 Primers for qPCR were determined using NCBI Primer BLAST (standard settings optimised  
628 for 100 bp exon-spanning amplicons) or designed manually using the same exon spanning  
629 rules when NCBI gene models were not available (For qPCR primers see: Supplementary  
630 Table 1). All qPCRs were run on a BioSystems StepOne Real-Time PCR System  
631 (ThermoFisher) using a Luna Universal qPCR Master Mix (NEB) at the fast setting following  
632 the manufacturer's instructions to determine dCT levels in triplicate. Genes encoding 40S  
633 Ribosomal Proteins S7 and L11 (RPS7 and RPL11) and actin were chosen as  
634 comparison/baseline genes. Primers were validated in triplicate by amplicon sequencing of  
635 qPCR products. Melt curves were generated after each run confirming only a single product  
636 per reaction. Amplification efficiencies of each primer pair were determined through dilution  
637 series. Results were analysed according to a standard protocol  
638 (<https://matzlab.weebly.com/data--code.html>) using in-house KNIME ([www.knime.com](http://www.knime.com))  
639 workflows comprising an R integration of the Bayesian analysis pipeline MCMC.qPCR [93].

640

#### 641 **Acknowledgments**

642 This work was supported by the Deutsche Forschungsgemeinschaft (DFG) (Emmy Noether  
643 Program Grant GU 1128/3–1 to A.G.); the H2020 European Research Council (ERC  
644 Consolidator Grant 724715 to A.G.) and the Helmholtz Association (BioInterfaces in  
645 Technology and Medicine (BIFTM) programme to N.S.F.).

646

647

#### 648 **References:**

649 1. Zapata F, Goetz FE, Smith SA, Howison M, Siebert S, Church SH, Sanders SM, Ames CL,  
650 McFadden CS, France SC, Daly M, Collins AG, Haddock SHD, Dunn CW, Cartwright P:  
651 **Phylogenomic Analyses Support Traditional Relationships within Cnidaria.** *PLoS ONE*  
652 2015, **10**:e0139068.

653 2. Janouskovec J, Gavelis GS, Burki F, Dinh D, BACHVAROFF TR, Gornik SG, Bright KJ,  
654 Imanian B, Strom SL, Delwiche CF, Waller RF, Fensome RA, Leander BS, Rohwer FL,  
655 Saldarriaga JF: **Major transitions in dinoflagellate evolution unveiled by**  
656 **phylotranscriptomics.** *Proceedings of the National Academy of Sciences* 2017, **114**:E171–  
657 E180.

658 3. LaJeunesse TC, Parkinson JE, Gabrielson PW, Jeong HJ, Reimer JD, Voolstra CR, Santos  
659 SR: **Systematic Revision of Symbiodiniaceae Highlights the Antiquity and Diversity of**  
660 **Coral Endosymbionts.** *Curr Biol* 2018, **28**:2570–2580.e6.

- 661 4. Fisher R, O’Leary RA, Low-Choy S, Mengersen K, Knowlton N, Brainard RE, Caley MJ:  
662 **Species Richness on Coral Reefs and the Pursuit of Convergent Global Estimates.**  
663 *Current Biology* 2015, **25**:500–505.
- 664 5. Kaniewska P, Alon S, Karako-Lampert S, Hoegh-Guldberg O, Levy O: **Signaling cascades**  
665 **and the importance of moonlight in coral broadcast mass spawning.** *doiorg* 2015.
- 666 6. Sweeney AM, Boch CA, Johnsen S, Morse DE: **Twilight spectral dynamics and the**  
667 **coral reef invertebrate spawning response.** *J Exp Biol* 2011, **214**:770–777.
- 668 7. Kanaya HJ, Kobayakawa Y, Itoh TQ: **Hydra vulgaris exhibits day-night variation in**  
669 **behavior and gene expression levels.** 2019:1–12.
- 670 8. Foo SA, Liddell L, Grossman A, Caldeira K: **Photo-movement in the sea anemone**  
671 **Aiptasia influenced by light quality and symbiotic association.** *Coral Reefs* 2019, **39**:47–  
672 54.
- 673 9. Bielecki J, Zaharoff AK, Leung NY, Garm A, Oakley TH: **Ocular and Extraocular**  
674 **Expression of Opsins in the Rhopalium of Tripedalia cystophora (Cnidaria: Cubozoa).**  
675 *PLoS ONE* 2014, **9**:e98870.
- 676 10. Oakley TH, Speiser DI: **How Complexity Originates: The Evolution of Animal Eyes.**  
677 *Annu Rev Ecol Evol Syst* 2015, **46**:237–260.
- 678 11. Suga H, Schmid V, Gehring WJ: **Evolution and functional diversity of jellyfish opsins.**  
679 *Current Biology* 2008, **18**:51–55.
- 680 12. Picciani N, Kerlin JR, Sierra N, Swafford AJM, Ramirez MD, Roberts NG, Cannon JT,  
681 Daly M, Oakley TH: **Prolific Origination of Eyes in Cnidaria with Co-option of Non-**  
682 **visual Opsins.** *Current Biology* 2018, **28**:2413–2419.e4.
- 683 13. Levy O, Appelbaum L, Leggat W, Gothlif Y, Hayward DC, Miller DJ, Hoegh-Guldberg  
684 O: **Light-responsive cryptochromes from a simple multicellular animal, the coral**  
685 **Acropora millepora.** *Science* 2007, **318**:467–470.
- 686 14. Levy O, Kaniewska P, Alon S, Eisenberg E, Karako-Lampert S, Bay LK, Reef R,  
687 Rodriguez-Lanetty M, Miller DJ, Hoegh-Guldberg O: **Complex Diel Cycles of Gene**  
688 **Expression in Coral-Algal Symbiosis.** *Science* 2011, **331**:175–175.
- 689 15. Artigas GQ, Lapébie P, Leclère L, Takeda N, Deguchi R, Jékely G, Momose T, Houliston  
690 E: **A gonad-expressed opsin mediates light-induced spawning in the jellyfish Clytia.**  
691 *elifesciencesorg* 2018.
- 692 16. Macias-Muñoz A, Murad R, Mortazavi A: **Molecular evolution and expression of opsin**  
693 **genes in Hydra vulgaris.** *BMC Genomics* 2019, **20**:1–19.
- 694 17. Terakita A: **The opsins.** *Genome Biol* 2005, **6**:213.
- 695 18. Plachetzki DC, Fong CR, Oakley TH: **The evolution of phototransduction from an**  
696 **ancestral cyclic nucleotide gated pathway.** *Proceedings of the Royal Society B: Biological*  
697 *Sciences* 2010, **277**:1963–1969.
- 698 19. Feuda R, Hamilton SC, McInerney JO, Pisani D: **Metazoan opsin evolution reveals a**  
699 **simple route to animal vision.** *Proceedings of the National Academy of Sciences* 2012,  
700 **109**:18868–18872.

- 701 20. Yokoyama H, Mizutani R: **Structural Biology of DNA (6-4) Photoproducts Formed by**  
702 **Ultraviolet Radiation and Interactions with Their Binding Proteins.** *IJMS* 2014,  
703 **15:20321–20338.**
- 704 21. Benjdia A: **DNA photolyases and SP lyase: structure and mechanism of light-**  
705 **dependent and independent DNA lyases.** *Curr Opin Struct Biol* 2012, **22:711–720.**
- 706 22. Cashmore AR: **Cryptochromes: Blue Light Receptors for Plants and Animals.** *Science*  
707 1999, **284:760–765.**
- 708 23. Chaves I, Pokorny R, Byrdin M, Hoang N, Ritz T, Brettel K, Essen L-O, van der Horst  
709 GTJ, Batschauer A, Ahmad M: **The Cryptochromes: Blue Light Photoreceptors in Plants**  
710 **and Animals.** *Annu Rev Plant Biol* 2011, **62:335–364.**
- 711 24. Malhotra K, Kim ST, Batschauer A, Dawut L, Sancar A: **Putative blue-light**  
712 **photoreceptors from Arabidopsis thaliana and Sinapis alba with a high degree of**  
713 **sequence homology to DNA photolyase contain the two photolyase cofactors but lack**  
714 **DNA repair activity.** *Biochemistry* 1995, **34:6892–6899.**
- 715 25. Lucas-Lledo JI, Lynch M: **Evolution of Mutation Rates: Phylogenomic Analysis of the**  
716 **Photolyase/Cryptochrome Family.** *Molecular Biology and Evolution* 2009, **26:1143–1153.**
- 717 26. Sancar A: **Structure and function of DNA photolyase and cryptochrome blue-light**  
718 **photoreceptors.** *Chem Rev* 2003, **103:2203–2237.**
- 719 27. Stanewsky R, Kaneko M, Emery P, Beretta B, Wager-Smith K, Kay SA, Rosbash M, Hall  
720 JC: **The cryb mutation identifies cryptochrome as a circadian photoreceptor in**  
721 **Drosophila.** *Cell* 1998, **95:681–692.**
- 722 28. Thompson CL, Sancar A: **Photolyase/cryptochrome blue-light photoreceptors use**  
723 **photon energy to repair DNA and reset the circadian clock.** *Oncogene* 2002, **21:9043–**  
724 **9056.**
- 725 29. Emery P, So WV, Kaneko M, Hall JC, Rosbash M: **CRY, a Drosophila clock and light-**  
726 **regulated cryptochrome, is a major contributor to circadian rhythm resetting and**  
727 **photosensitivity.** *Cell* 1998, **95:669–679.**
- 728 30. Kume K, Zylka MJ, Sriram S, Shearman LP, Weaver DR, Jin X, Maywood ES, Hastings  
729 MH, Reppert SM: **mCRY1 and mCRY2 are essential components of the negative limb of**  
730 **the circadian clock feedback loop.** *Cell* 1999, **98:193–205.**
- 731 31. Shearman LP, Sriram S, Weaver DR, Maywood ES, Chaves I, Zheng B, Kume K, Lee  
732 CC, van der Horst GT, Hastings MH, Reppert SM: **Interacting molecular loops in the**  
733 **mammalian circadian clock.** *Science* 2000, **288:1013–1019.**
- 734 32. Gindt YM, Messyasz A, Jumbo PI: **Binding of Substrate Locks the Electrochemistry of**  
735 **CRY-DASH into DNA Repair.** *Biochemistry* 2015, **54:2802–2805.**
- 736 33. Weis VM, Davy SK, Hoegh-Guldberg O, Rodriguez-Lanetty M, Pringle JR: **Cell biology**  
737 **in model systems as the key to understanding corals.** *Trends in Ecology & Evolution* 2008,  
738 **23:369–376.**
- 739 34. Wolfowicz I, Baumgarten S, Voss PA, Hambleton EA, Voolstra CR, Hatta M, Guse A:  
740 **Aiptasia sp. larvae as a model to reveal mechanisms of symbiont selection in cnidarians.**  
741 *Sci Rep* 2016, **6:32366.**

- 742 35. Neubauer E-F, Poole AZ, Neubauer P, Detournay O, Tan K, Davy SK, Weis VM: **A**  
743 **diverse host thrombospondin-type-1 repeat protein repertoire promotes symbiont**  
744 **colonization during establishment of cnidarian-dinoflagellate symbiosis.** *Elife* 2017, **6**:1–  
745 26.
- 746 36. Matthews JL, Crowder CM, Oakley CA, Lutz A, Roessner U, Meyer E, Grossman AR,  
747 Weis VM, Davy SK: **Optimal nutrient exchange and immune responses operate in**  
748 **partner specificity in the cnidarian-dinoflagellate symbiosis.** *Proceedings of the National*  
749 *Academy of Sciences* 2017, **114**:13194–13199.
- 750 37. Hambleton EA, Jones VAS, Maegele I, Kvaskoff D, Sachsenheimer T, Guse A: **Sterol**  
751 **transfer by atypical cholesterol-binding NPC2 proteins in coral-algal symbiosis.**  
752 *elifesciencesorg* 2019.
- 753 38. Bucher M, Wolfowicz I, Voss PA, Hambleton EA, Guse A: **Development and Symbiosis**  
754 **Establishment in the Cnidarian Endosymbiosis Model *Aiptasia* sp.** *Sci Rep* 2016,  
755 **6**:19867.
- 756 39. Tolleter D, Seneca FO, DeNofrio JC, Krediet CJ, Palumbi SR, Pringle JR, Grossman AR:  
757 **Coral bleaching independent of photosynthetic activity.** *Curr Biol* 2013, **23**:1782–1786.
- 758 40. Grawunder D, Hambleton EA, Bucher M, Wolfowicz I, Bechtoldt N, Guse A: **Induction**  
759 **of Gametogenesis in the Cnidarian Endosymbiosis Model *Aiptasia* sp.** *Sci Rep* 2015,  
760 **5**:15677.
- 761 41. Arendt D: **Ciliary Photoreceptors with a Vertebrate-Type Opsin in an Invertebrate**  
762 **Brain.** *Science* 2004, **306**:869–871.
- 763 42. Vöcking O, Kourtesis I, Tumu SC, Hausen H: **Co-expression of xenopsin and**  
764 **rhabdomeric opsin in photoreceptors bearing microvilli and cilia.** *elifesciencesorg* 2017.
- 765 43. Plachetzki DC, Fong CR, Oakley TH: **Cnidocyte discharge is regulated by light and**  
766 **opsin-mediated phototransduction.** *BMC Biol* 2012, **10**:17.
- 767 44. Musilova Z, Cortesi F, Matschiner M, Davies WIL, Patel JS, Stieb SM, de Buserolles F,  
768 Malmstrøm M, Tørresen OK, Brown CJ, Mountford JK, Hanel R, Stenkamp DL, Jakobsen  
769 KS, Carleton KL, Jentoft S, Marshall J, Salzburger W: **Vision using multiple distinct rod**  
770 **opsins in deep-sea fishes.** *Science* 2019, **364**:588–592.
- 771 45. Hope AJ, Partridge JC, Dulai KS, Hunt DM: **Mechanisms of wavelength tuning in the**  
772 **rod opsins of deep-sea fishes.** *Proceedings of the Royal Society B: Biological Sciences* 1997,  
773 **264**:155–163.
- 774 46. Hunt DM, Dulai KS, Partridge JC, Cottrill P, Bowmaker JK: **The molecular basis for**  
775 **spectral tuning of rod visual pigments in deep-sea fish.** *J Exp Biol* 2001, **204**:3333–3344.
- 776 47. Imai H, Kojima D, Oura T, Tachibanaki S, Terakita A, Shichida Y: **Determinants of**  
777 **visual pigment absorbance: identification of the retinylidene Schiff's base counterion in**  
778 **bovine rhodopsin.** *Proceedings of the National Academy of Sciences* 1997, **94**:2322–2326.
- 779 48. Terakita A, Nagata T: **Functional Properties of Opsins and their Contribution to**  
780 **Light-Sensing Physiology.** *Zoological Science* 2014, **31**:653–659.
- 781 49. Terakita A, Yamashita T, Shichida Y: **Highly conserved glutamic acid in the**  
782 **extracellular IV-V loop in rhodopsins acts as the counterion in retinochrome, a member**

- 783 **of the rhodopsin family.** *Proc Natl Acad Sci USA* 2000, **97**:14263–14267.
- 784 50. Sakmar TP, Franke RR, Khorana HG: **Glutamic acid-113 serves as the retinylidene**  
785 **Schiff base counterion in bovine rhodopsin.** *Proc Natl Acad Sci USA* 1989, **86**:8309–8313.
- 786 51. Zhukovsky E, Oprian D: **Effect of carboxylic acid side chains on the absorption**  
787 **maximum of visual pigments.** *Science* 1989, **246**:928–930.
- 788 52. Tsutsui K, Shichida Y: **Multiple functions of Schiff base counterion in rhodopsins.**  
789 *Photochem Photobiol Sci* 2010, **9**:1426–1434.
- 790 53. Gerrard E, Mutt E, Nagata T, Koyanagi M, Flock T, Lesca E, Schertler GFX, Terakita A,  
791 Deupi X, Lucas RJ: **Convergent evolution of tertiary structure in rhodopsin visual**  
792 **proteins from vertebrates and box jellyfish.** *Proceedings of the National Academy of*  
793 *Sciences* 2018, **115**:6201–6206.
- 794 54. Baumgarten S, Simakov O, Esherick LY, Liew YJ, Lehnert EM, Michell CT, Li Y,  
795 Hambleton EA, Guse A, Oates ME, Gough J, Weis VM, Aranda M, Pringle JR, Woolstra CR:  
796 **The genome of Aiptasia, a sea anemone model for coral symbiosis.** *Proceedings of the*  
797 *National Academy of Sciences* 2015, **112**:11893–11898.
- 798 55. Gorbunov MY, Falkowski PG: **Photoreceptors in the cnidarian hosts allow symbiotic**  
799 **corals to sense blue moonlight.** *Limnol Oceanogr* 2002, **47**:309–315.
- 800 56. Michael AK, Fribourgh JL, Van Gelder RN, Partch CL: **Animal Cryptochromes:**  
801 **Divergent Roles in Light Perception, Circadian Timekeeping and Beyond.** *Photochem*  
802 *Photobiol* 2017, **93**:128–140.
- 803 57. Lin C, Todo T: **The cryptochromes.** *Genome Biol* 2005, **6**:220.
- 804 58. Rivera AS, Ozturk N, Fahey B, Plachetzki DC, Degnan BM, Sancar A, Oakley TH: **Blue-**  
805 **light-receptive cryptochrome is expressed in a sponge eye lacking neurons and opsin.** *J*  
806 *Exp Biol* 2012, **215**:1278–1286.
- 807 59. Reitzel AM, Behrendt L, Tarrant AM: **Light Entrained Rhythmic Gene Expression in**  
808 **the Sea Anemone Nematostella vectensis: The Evolution of the Animal Circadian Clock.**  
809 *PLoS ONE* 2010, **5**:e12805.
- 810 60. Sorek M, Schnytzer Y, Ben-Asher HW, Caspi VC, Chen C-S, Miller DJ, Levy O: **Setting**  
811 **the pace: host rhythmic behaviour and gene expression patterns in the facultatively**  
812 **symbiotic cnidarian Aiptasia are determined largely by Symbiodinium.** 2018:1–12.
- 813 61. Zhao H, Di Mauro G, Lungu-Mitea S, Negrini P, Guarino AM, Frigato E, Braunbeck T,  
814 Ma H, Lamparter T, Vallone D, Bertolucci C, Foulkes NS: **Modulation of DNA Repair**  
815 **Systems in Blind Cavefish during Evolution in Constant Darkness.** *Curr Biol* 2018,  
816 **28**:3229–3243.e4.
- 817 62. Mracek P, Santoriello C, Idda ML, Pagano C, Ben-Moshe Z, Gothilf Y, Vallone D,  
818 Foulkes NS: **Regulation of per and cry Genes Reveals a Central Role for the D-Box**  
819 **Enhancer in Light-Dependent Gene Expression.** *PLoS ONE* 2012, **7**:e51278.
- 820 63. Vatine G, Vallone D, Appelbaum L, Mracek P, Ben-Moshe Z, Lahiri K, Gothilf Y,  
821 Foulkes NS: **Light Directs Zebrafish period2 Expression via Conserved D and E Boxes.**  
822 *Plos Biol* 2009, **7**:e1000223.

- 823 64. Pagano C, Siauciunaite R, Idda ML, Ruggiero G, Ceinos RM, Pagano M, Frigato E,  
824 Bertolucci C, Foulkes NS, Vallone D: **Evolution shapes the responsiveness of the D-box**  
825 **enhancer element to light and reactive oxygen species in vertebrates.** *Sci Rep* 2018,  
826 8:13180.
- 827 65. Gachon F, Olela FF, Schaad O, Descombes P, Schibler U: **The circadian PAR-domain**  
828 **basic leucine zipper transcription factors DBP, TEF, and HLF modulate basal and**  
829 **inducible xenobiotic detoxification.** *Cell Metab* 2006, 4:25–36.
- 830 66. Mitsui S: **Antagonistic role of E4BP4 and PAR proteins in the circadian oscillatory**  
831 **mechanism.** *Genes & Development* 2001, 15:995–1006.
- 832 67. Ramirez MD, Pairett AN, Pankey MS, Serb JM, Speiser DI, Swafford AJ, Oakley TH:  
833 **The last common ancestor of most bilaterian animals possessed at least 9 opsins.** *Genome*  
834 *Biol Evol* 2016:evw248.
- 835 68. Cunningham A, Ramage L, McKee D: **Relationships between inherent optical**  
836 **properties and the depth of penetration of solar radiation in optically complex coastal**  
837 **waters.** *J Geophys Res Oceans* 2013, 118:2310–2317.
- 838 69. Renema W: **Accepted Manuscript.** *Earth-Science Reviews* 2017:1–104.
- 839 70. Sekharan S, Altun A, Morokuma K: **Photochemistry of Visual Pigment in a G q**  
840 **Protein-Coupled Receptor (GPCR)-Insights from Structural and Spectral Tuning**  
841 **Studies on Squid Rhodopsin.** *Chem Eur J* 2010, 16:1744–1749.
- 842 71. Shlesinger T, Loya Y: **Breakdown in spawning synchrony: A silent threat to coral**  
843 **persistence.** *Science* 2019, 365:1002–1007.
- 844 72. Jones VAS, Bucher M, Hambleton EA, Guse A: **Microinjection to deliver protein,**  
845 **mRNA, and DNA into zygotes of the cnidarian endosymbiosis model Aiptasia sp.** *Sci Rep*  
846 2018, 8:679–11.
- 847 73. Reitzel AM, Tarrant AM, Levy O: **Circadian Clocks in the Cnidaria: Environmental**  
848 **Entrainment, Molecular Regulation, and Organismal Outputs.** *Integr Comp Biol* 2013,  
849 53:118–130.
- 850 74. Bozek K, Relógio A, Kielbasa SM, Heine M, Dame C, Kramer A, Herzog H: **Regulation**  
851 **of Clock-Controlled Genes in Mammals.** *PLoS ONE* 2009, 4:e4882.
- 852 75. Chapman JA, Kirkness EF, Simakov O, Hampson SE, Mitros T, Weinmaier T, Rattei T,  
853 Balasubramanian PG, Borman J, Busam D, Disbennett K, Pfannkoch C, Sumin N, Sutton GG,  
854 Viswanathan LD, Walenz B, Goodstein DM, Hellsten U, Kawashima T, Prochnik SE, Putnam  
855 NH, Shu S, Blumberg B, Dana CE, Gee L, Kibler DF, Law L, Lindgens D, Martinez DE,  
856 Peng J, et al.: **The dynamic genome of Hydra.** *Nature* 2010, 464:592–596.
- 857 76. Oren M, Tarrant AM, Alon S, Simon-Blecher N, Elbaz I, Appelbaum L, Levy O:  
858 **Profiling molecular and behavioral circadian rhythms in the non-symbiotic sea anemone**  
859 **Nematostella vectensis.** *Sci Rep* 2015, 5:11418.
- 860 77. Brudler R, Hitomi K, Daiyasu H, Toh H, Kucho K-I, Ishiura M, Kanehisa M, Roberts VA,  
861 Todo T, Tainer JA, Getzoff ED: **Identification of a New Cryptochrome Class.** *Molecular*  
862 *Cell* 2003, 11:59–67.
- 863 78. Kim D, Langmead B, Salzberg SL: **HISAT: a fast spliced aligner with low memory**

- 864 **requirements.** *Nat Methods* 2015, **12**:357–360.
- 865 79. Kayal E, Bentlage B, Pankey MS, Ohdera AH, Medina M, Plachetzki DC, Collins AG,  
866 Ryan JF: **Phylogenomics provides a robust topology of the major cnidarian lineages and**  
867 **insights on the origins of key organismal traits.** 2018:1–18.
- 868 80. Capella-Gutierrez S, Silla-Martinez JM, Gabaldon T: **trimAl: a tool for automated**  
869 **alignment trimming in large-scale phylogenetic analyses.** *Bioinformatics* 2009, **25**:1972–  
870 1973.
- 871 81. Smith SA, Dunn CW: **Phyutility: a phyloinformatics tool for trees, alignments and**  
872 **molecular data.** *Bioinformatics* 2008, **24**:715–716.
- 873 82. Darriba D, Taboada GL, Doallo R, Posada D: **ProtTest 3: fast selection of best-fit**  
874 **models of protein evolution.** *Bioinformatics* 2011, **27**:1164–1165.
- 875 83. Kalyaanamoorthy S, Minh BQ, Wong TKF, Haeseler von A, Jermini LS: **ModelFinder:**  
876 **fast model selection for accurate phylogenetic estimates.** *Nat Methods* 2017, **14**:587–589.
- 877 84. Nguyen L-T, Schmidt HA, Haeseler von A, Minh BQ: **IQ-TREE: a fast and effective**  
878 **stochastic algorithm for estimating maximum-likelihood phylogenies.** *Molecular Biology*  
879 *and Evolution* 2015, **32**:268–274.
- 880 85. Ronquist F, Teslenko M, van der Mark P, Ayres DL, Darling A, Höhna S, Larget B, Liu  
881 L, Suchard MA, Huelsenbeck JP: **MrBayes 3.2: efficient Bayesian phylogenetic inference**  
882 **and model choice across a large model space.** *Systematic Biology* 2012, **61**:539–542.
- 883 86. Stöver BC, Müller KF: **TreeGraph 2: Combining and visualizing evidence from**  
884 **different phylogenetic analyses.** *BMC Bioinformatics* 2010, **11**:275.
- 885 87. Crooks GE, Hon G, Chandonia J-M, Brenner SE: **WebLogo: a sequence logo generator.**  
886 *Genome Research* 2004, **14**:1188–1190.
- 887 88. Odrionitz F, Pillmann H, Keller O, Waack S, Kollmar M: **WebScipio: An online tool for**  
888 **the determination of gene structures using protein sequences.** *BMC Genomics* 2008,  
889 **9**:422.
- 890 89. Mühlhausen S, Hellkamp M, Kollmar M: **GenePainter v. 2.0 resolves the taxonomic**  
891 **distribution of intron positions.** *Bioinformatics* 2014, **31**:1302–1304.
- 892 90. Lehnert EM, Mouchka ME, Burriesci MS, Gallo ND, Schwarz JA, Pringle JR: **Extensive**  
893 **differences in gene expression between symbiotic and aposymbiotic cnidarians.** *G3*  
894 *(Bethesda)* 2014, **4**:277–295.
- 895 91. Patro R, Duggal G, Love MI, Irizarry RA, Kingsford C: **Salmon provides fast and bias-**  
896 **aware quantification of transcript expression.** *Nat Methods* 2017, **14**:417–419.
- 897 92. Frith MC: **Detection of functional DNA motifs via statistical over-representation.**  
898 *Nucleic Acids Research* 2004, **32**:1372–1381.
- 899 93. Matz MV, Wright RM, Scott JG: **No Control Genes Required: Bayesian Analysis of**  
900 **qRT-PCR Data.** *PLoS ONE* 2013, **8**:e71448.
- 901 94. Davies WL, Hankins MW, Foster RG: **Vertebrate ancient opsin and melanopsin:**  
902 **divergent irradiance detectors.** *Photochem Photobiol Sci* 2010, **9**:1444.



## 903 **Figure legends**

### 904 **Figure 1: The cnidarian lifestyle is dominated by sun- and moonlight**

905 (A) Cladogram revealing phylogenetic relations within the phylum cnidaria showing the two  
906 main classes Anthozoa and Medusozoa and their major subclasses. (B) Schematic overview  
907 of how environmental light impacts (symbiotic) cnidarians throughout life from embryo to  
908 adult. Light by the moon induces spawning and synchronizes gamete release. Larvae then use  
909 environmental light for orientation and during settlement. Adults change behaviour in  
910 response to light to modulate photosynthesis rates of symbionts, to seek shelter from UV  
911 radiation or for predator avoidance.

912

### 913 **Figure 2: Anthozoa retained the most ancient animal opsin classes and evolved a novel** 914 **sub-group (actinarian ASO-IIs)**

915 (A) Consensus tree topology generated with IQTree reveals that cnidarians have at least 3  
916 opsin paralogs. Anthozoans possess ASO-Is and ASO-IIs, which are monophyletic. ASO-I  
917 appears ancestral to all other animal opsins. All cnidarians (Anthozoa and Medusozoa)  
918 possess cnidopsins. Cnidopsins are monophyletic also and sister to the animal xenopsins.  
919 ASO-IIs contain two distinct sub-clusters. The first cluster comprises solely *Actiniaria* (sea  
920 anemone) sequences and we named this grouping ‘Actinarian ASO-IIs’ while the second  
921 cluster contains genes from all Anthozoa families including corals. Intron phase analysis  
922 suggests that ASO-IIs and Actinarian ASO-IIs both are distinct from ctenopsin and c-opsin  
923 gene structures despite their common ancestry lacking any conserved homologous intron  
924 positions (Supplementary Figure 1A). Note: *C. hemispherica* opsin 9 and opsin 10 resolve at  
925 the base of the ASO-IIs, however elsewhere they are included within the cnidopsins albeit  
926 with long branches [15]. Support values are (SH-aLRT bootstrap percentages/UFBoots  
927 bootstrap percentages/aBayes Bayesian posterior probabilities). Branch length is proportional  
928 to substitutions per site. (B) Bayesian topology tree generated with MrBayes using an  
929 expanded ASO-II dataset (Picciani et al. (2018)) confirms the ASO-II/actinarian ASO-II sub-  
930 clustering. Branch length is proportional to substitutions per site. (A) + (B) Full trees can be  
931 accessed through Supplementary File 4. (C) Sequence logo showing that most actinarian  
932 ASO-IIs possess a typical primary counter ion (glutamic acid [E]) at position 181; all other  
933 ASO-IIs lack this counter ion. The separation of the two ASO-groupings is also reflected in  
934 their intron phasing: both ASO-II groupings possess distinct homologous introns  
935 (Supplementary Figure 1B).

936

937

938 **Figure 3: Expression profiles of *Aiptasia* opsins varies between life-stages and symbiotic**  
939 **state**

940 (A) Bar chart comparing the expression (TMM normalised reads) of *Aiptasia* opsins in adults  
941 and larva. ASO-I.2, ASO-II.2, ASO-II.3, ASO-II.5 and ASO-II.12 are significantly  
942 upregulated in larva. ASO-II.8, ASO-II.9 and ASO-II.11 are significantly upregulated in  
943 adults. (B) Bar chart comparing the expression (TMM normalised reads) of *Aiptasia* opsins in  
944 symbiotic and aposymbiotic adults. ASO-II.12, ASO-II.7 and ASO-II.11 are significantly  
945 upregulated in symbiotic adults. (C) Tissue-specific qPCR after Methacarn fixation of adult  
946 *Aiptasia* polyps reveals that ASO-II.3 is significantly upregulated in mesenteries, when  
947 compared with tentacle tissue. Data for all other opsins are shown in Supplementary Figure 3.  
948 For all charts significant differences are: \*  $P \leq 0.05$ , \*\*  $P \leq 0.01$ , \*\*\*  $P \leq 0.001$ ; and error  
949 bars are: SEM.

950

951

952 **Figure 4: PL and CRY phylogeny reveals a novel, Anthozoan-specific CRY class**

953 (A) Consensus tree topology generated with IQTree reveals that PLs (CPD-II, PLs and (6-4)  
954 PLs) and CRY-DASHs are common amongst all Cnidaria. Other CRYs including CRY-II  
955 occur only in Anthozoa but are entirely absent from Medusozoa. The present phylogeny is  
956 supported by highly conserved and specific exon-intron patterns (Supplementary Figure X)  
957 suggesting that CRY-IIs and (6-4) PLs share a common origin. A well supported but  
958 previously unidentified, anthozoan-specific CRY family resolves at the base of animal CRY-  
959 IIs and (6-4) PLs which we name Anthozoan-specific CRYs (AnthoCRYs). Support values  
960 are (SH-aLRT bootstrap percentages/UFBoots bootstrap percentages/aBayes Bayesian  
961 posterior probabilities). A full tree can be accessed through Supplementary File 5. (B)  
962 Cryptochromes (except CRY-DASH) are absent in Medusozoa, while the Anthozoa possess a  
963 novel class of cryptochromes (AnthoCRYs), which contain unique tandem duplications  
964 including up to 6 copies of the PHR region comprising the N-terminal DNA-binding  
965 photolyase domain (also called alpha/beta domain, red) and the chromophore-binding FAD  
966 domain (grey). (C) A comparison between cDNA- and genomic DNA-derived exon spanning  
967 amplicon sequencing confirms PHR region duplication in *Aiptasia* AnthoCRY.1  
968 (XP\_020902079).

969

970

971 **Figure 5: Light-induced expression profiles of *Aiptasia* CRYs and PLs**

972 (A) – (F) qPCR analysis of CRY and PL gene expression in response to light exposure in  
973 adult *Aiptasia*. Animals were adapted for 4 days to constant darkness and then exposed to  
974 light for a period of 8 hours; sampling every 2 hours. Control animals were kept in constant

975 darkness. *Aiptasia* CPD-II, *Aiptasia* DASH-CRY and *Aiptasia* (6-4) PL are unresponsive to  
976 light treatment. AnthoCRY.1, AnthoCRY.1 and CRY-II expression is rapidly induced by  
977 light. (G) – (I) qPCR analysis of CRY-II, AnthoCRY.1 and AnthoCRY.2 expression in LD-  
978 adapted *Aiptasia* polyps. Animals were exposed to light-dark (LD, 12 hours:12 hours) cycles  
979 and then transferred to constant darkness (DD), sampling at 2, 8, 14 and 20 hours (LD) and  
980 26, 32, 38 and 44 hours (DD). Under LD conditions, we observed rhythmic expression with  
981 elevated expression, peaking at 8 hours after lights on, and then decreasing during the dark  
982 period, with a trough at 8 hours after lights off. In contrast, immediately upon transfer to DD  
983 conditions, rhythmic expression was absent. (A) - (I) ANOVA was performed to confirm  
984 statistically significant differences at each time point;  $P < 0.01$ . (J) Schematic representation  
985 of the D- and E-box distribution (green and red boxes respectively) in *Aiptasia* PL and CRY  
986 promoter regions extending up to 1000 bp upstream from the ATG start codons.

987

988 **Supplementary Figure 1: Intron phase analysis of opsin genes and summary table**  
989 **showing conserved structural and functional opsin motifs in *Aiptasia***

990 (A) Intron phase analysis of all *Aiptasia* opsins showing that the type-specific introns in  
991 Actiniarian ASO-IIs and ASO-IIIs are conserved not only by position but also by intron phase  
992 (red boxes). (B) Summary table showing conserved structural and functional opsin motifs in  
993 *Aiptasia* in comparison to bovine rhodopsin and *Xenopus* melanopsin. These include: (i) two  
994 conserved cysteine (C) residues at positions 110 and 187, which are involved in disulphide-  
995 bond formation; (ii) two conserved glutamate [E] at position 113 and 181, which act as  
996 negative counterion to the proton of the Schiff base and may also affect spectral tuning; (iii) a  
997 glutamate [E] at position 134 located within a conserved motif (134–136; ERY in rhodopsin)  
998 that provides a negative charge to stabilise the inactive opsin molecule; (iv) a conserved  
999 lysine [K] at position 296 that is covalently linked to the 11-cis retinal chromophore via a  
1000 Schiff base; (v) a conserved NPxxYx motif (302–313), which in rhodopsin contains a NKQ  
1001 motif (310–312) that assists in maintaining structural integrity upon photopigment activation.  
1002 The approximate position of the transmembrane domains is also depicted; modified from  
1003 [94].

1004

1005 **Supplementary Figure 2: Distance matrix**

1006 Distance matrix reflecting an alignment of 577 animal opsins. Note that opsins are clustered  
1007 by amino acid similarity and are not sorted based on phylogenetic distance only but overall  
1008 sequence similarity. Cnidarian opsin paralog clusters are highlighted and their names colour  
1009 coded.

1010

1011 **Supplementary Figure 3: Extended expression profiles of *Aiptasia* opsins in mesentery**  
1012 **and tentacle tissue**

1013 qPCR analysis of mesentery and tentacle tissue after Methacarn fixation of adult *Aiptasia*  
1014 polyps. ASO-I.2, ASO-II.1, ASO-II.4, Cnidopsin.3 and ASO\_II.7 are significantly  
1015 upregulated in tentacle tissue. ASO-II.3 is significantly upregulated in mesenteries.  
1016 Cnidopsin.4 expression was not detected; \*\*  $P \leq 0.01$ ; error bars are: SEM.

1017

1018 **Supplementary Figure 4: Intron phase analysis of PL and CRY genes and expression**  
1019 **profiles of *Aiptasia* PLs and CRYs in larva and adults** (A) Intron phase analysis of all

1020 *Aiptasia* PLs and CRYs showing that select introns in CPDs, CRY-DASHs, CRY-Is,  
1021 AnthoCRYs, animal CRY-IIs including Anthozoan CRY-IIs, and (6-4) PLs are conserved not  
1022 only by position but also by intron phase (red boxes). (B) Bar chart comparing the expression  
1023 (TMM normalised reads) of *Aiptasia* PLs and CRYs in adults and larva. AnthoCRY.2 is  
1024 significantly upregulated in adults; \*\*  $P \leq 0.01$ .

1025

1026 **Supplementary Figure 5: *Aiptasia* PAR-bZIP TF phylogeny**

1027 Maximum-likelihood tree generated with iqTree reveals that *Aiptasia* (*E. pallida* in the tree)  
1028 possesses four PAR-bZIP TFs: three TFs basal to HLF-type PAR/bZIP TFs and one DBP TF.  
1029 The alignments and tree file including accession numbers are provided in nexus format  
1030 (Supplementary File 6).

Figure 1

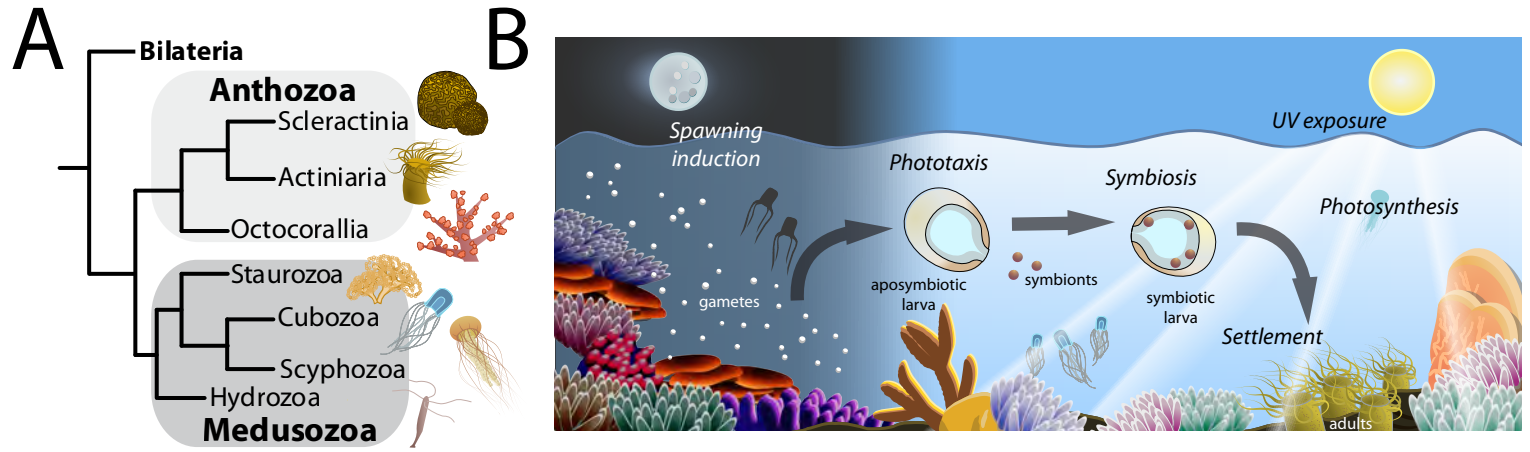

Figure 2

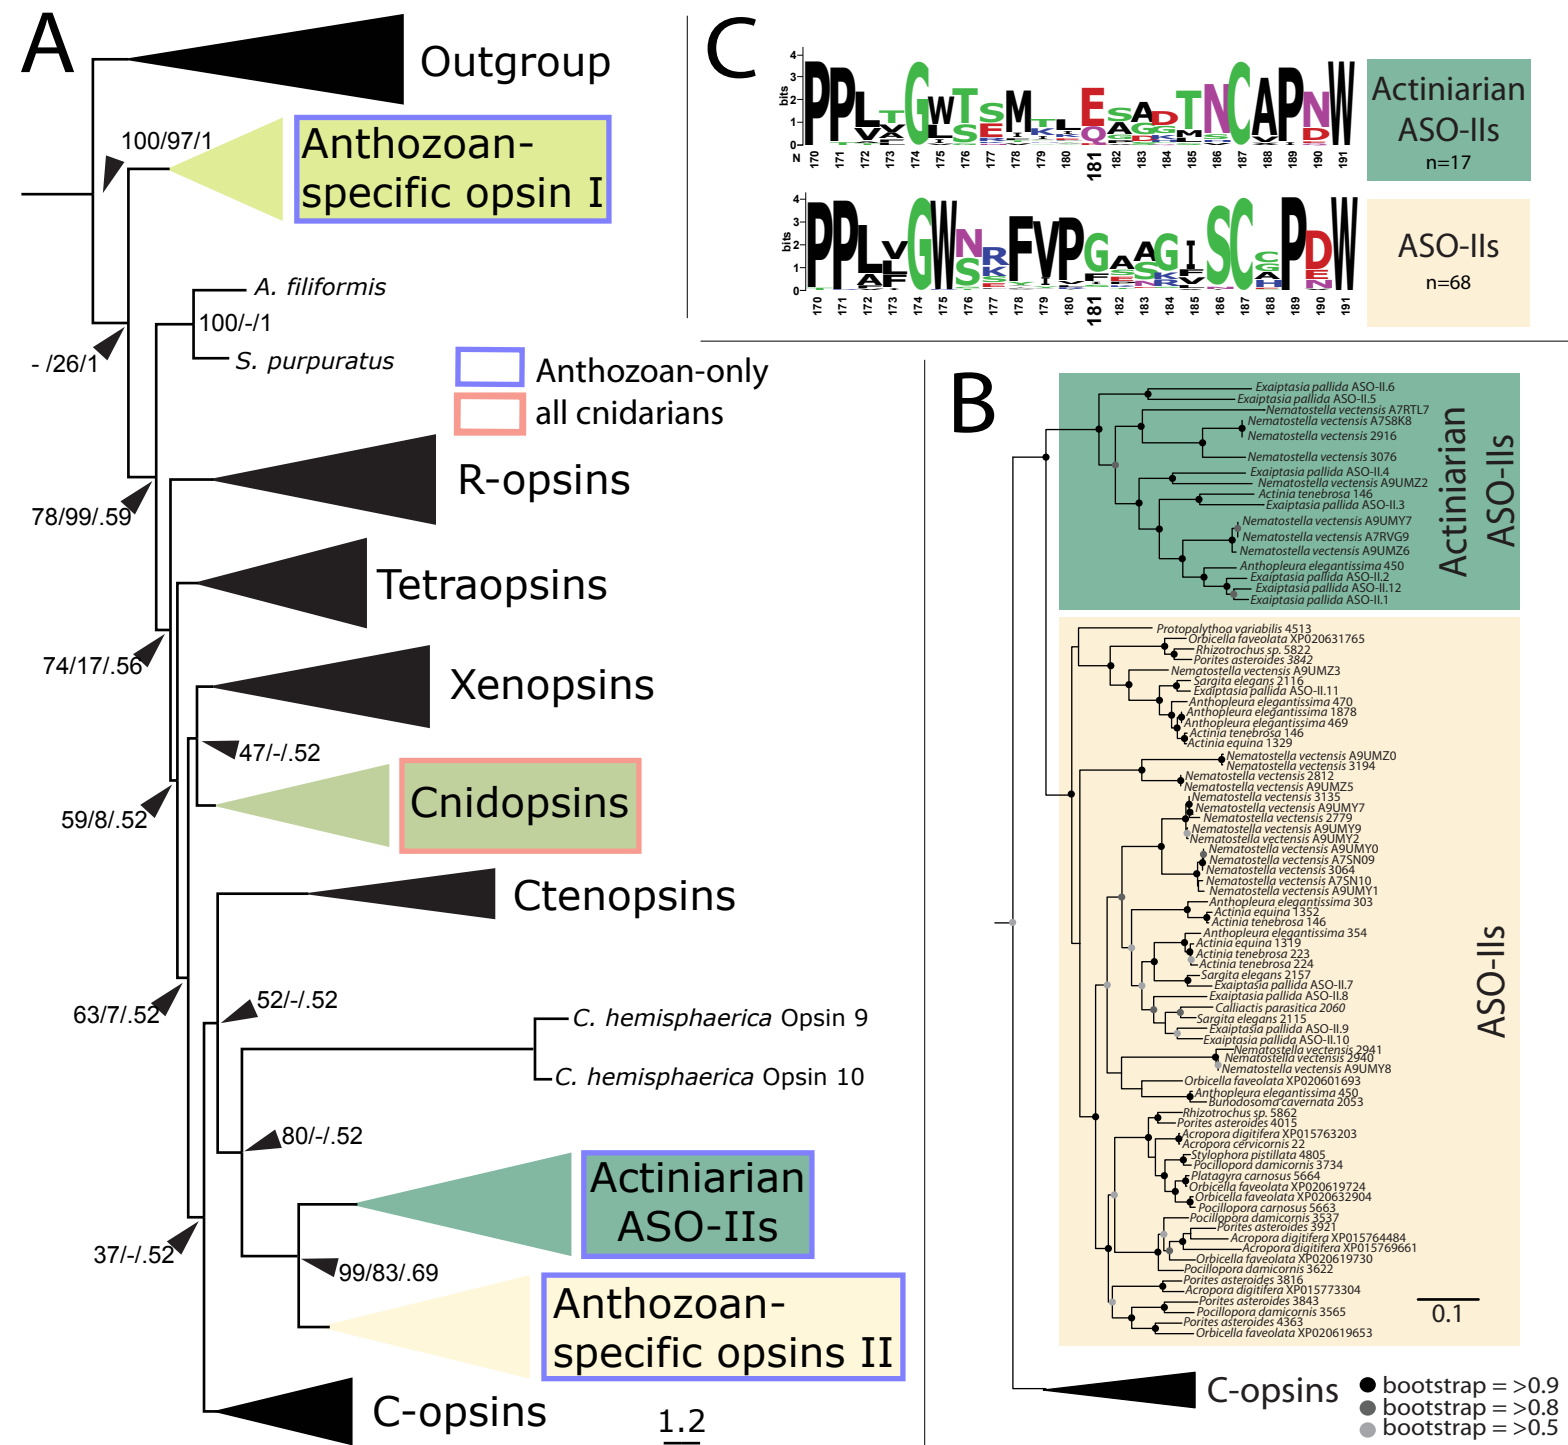

# Figure 3

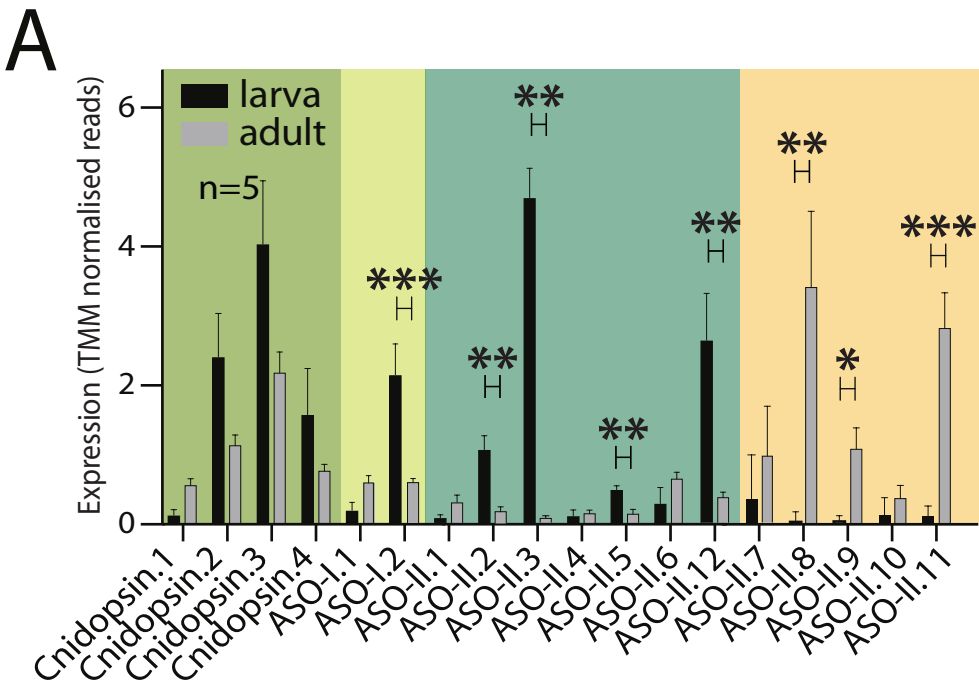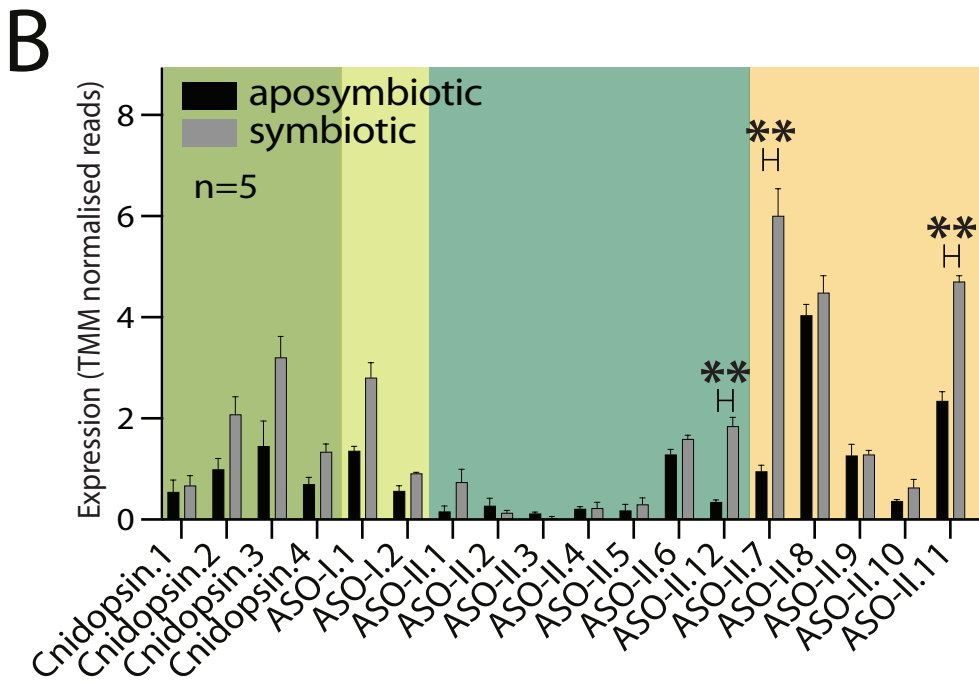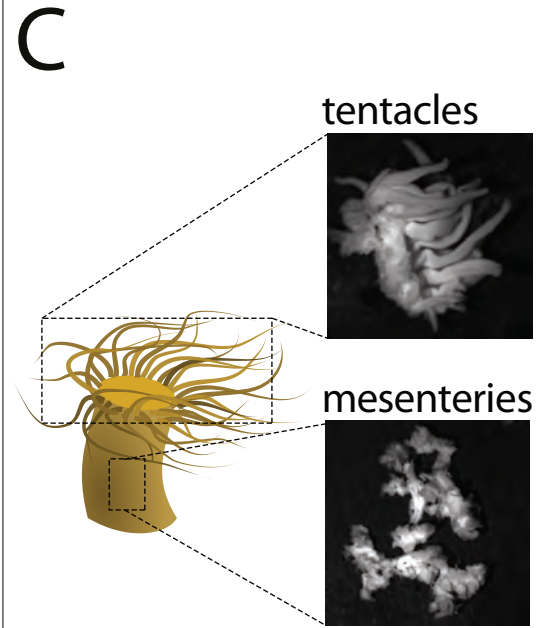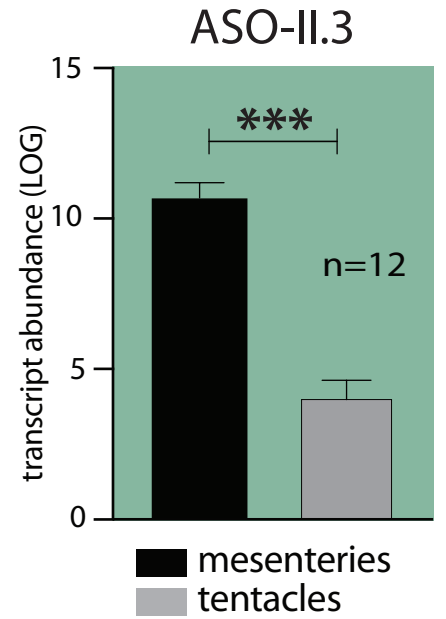

# Figure 4

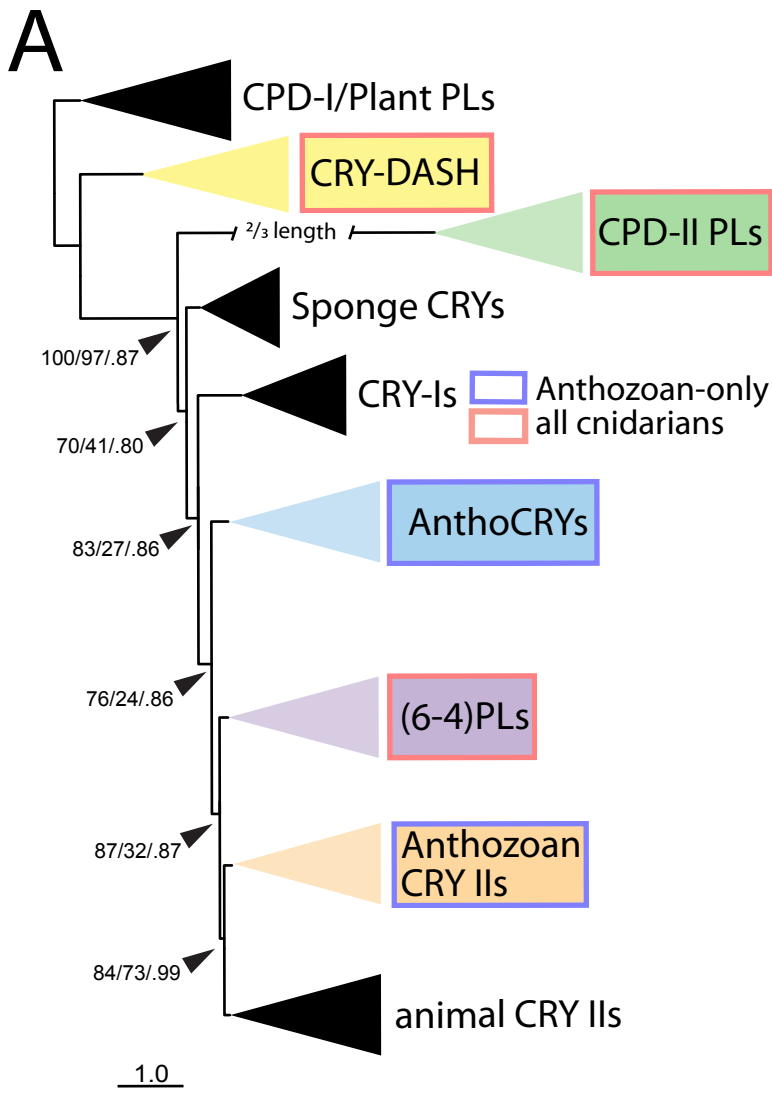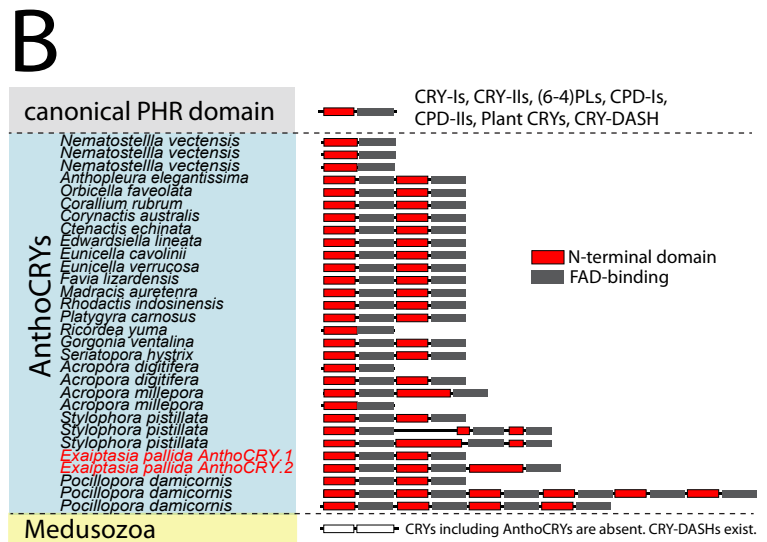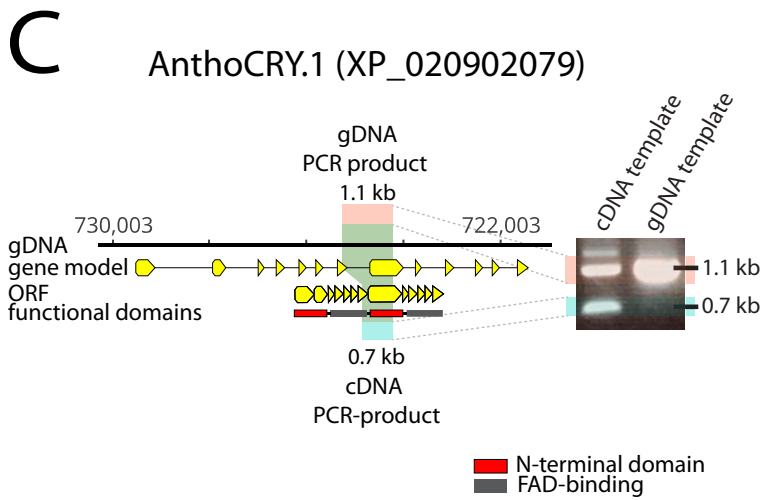



# Figure 5

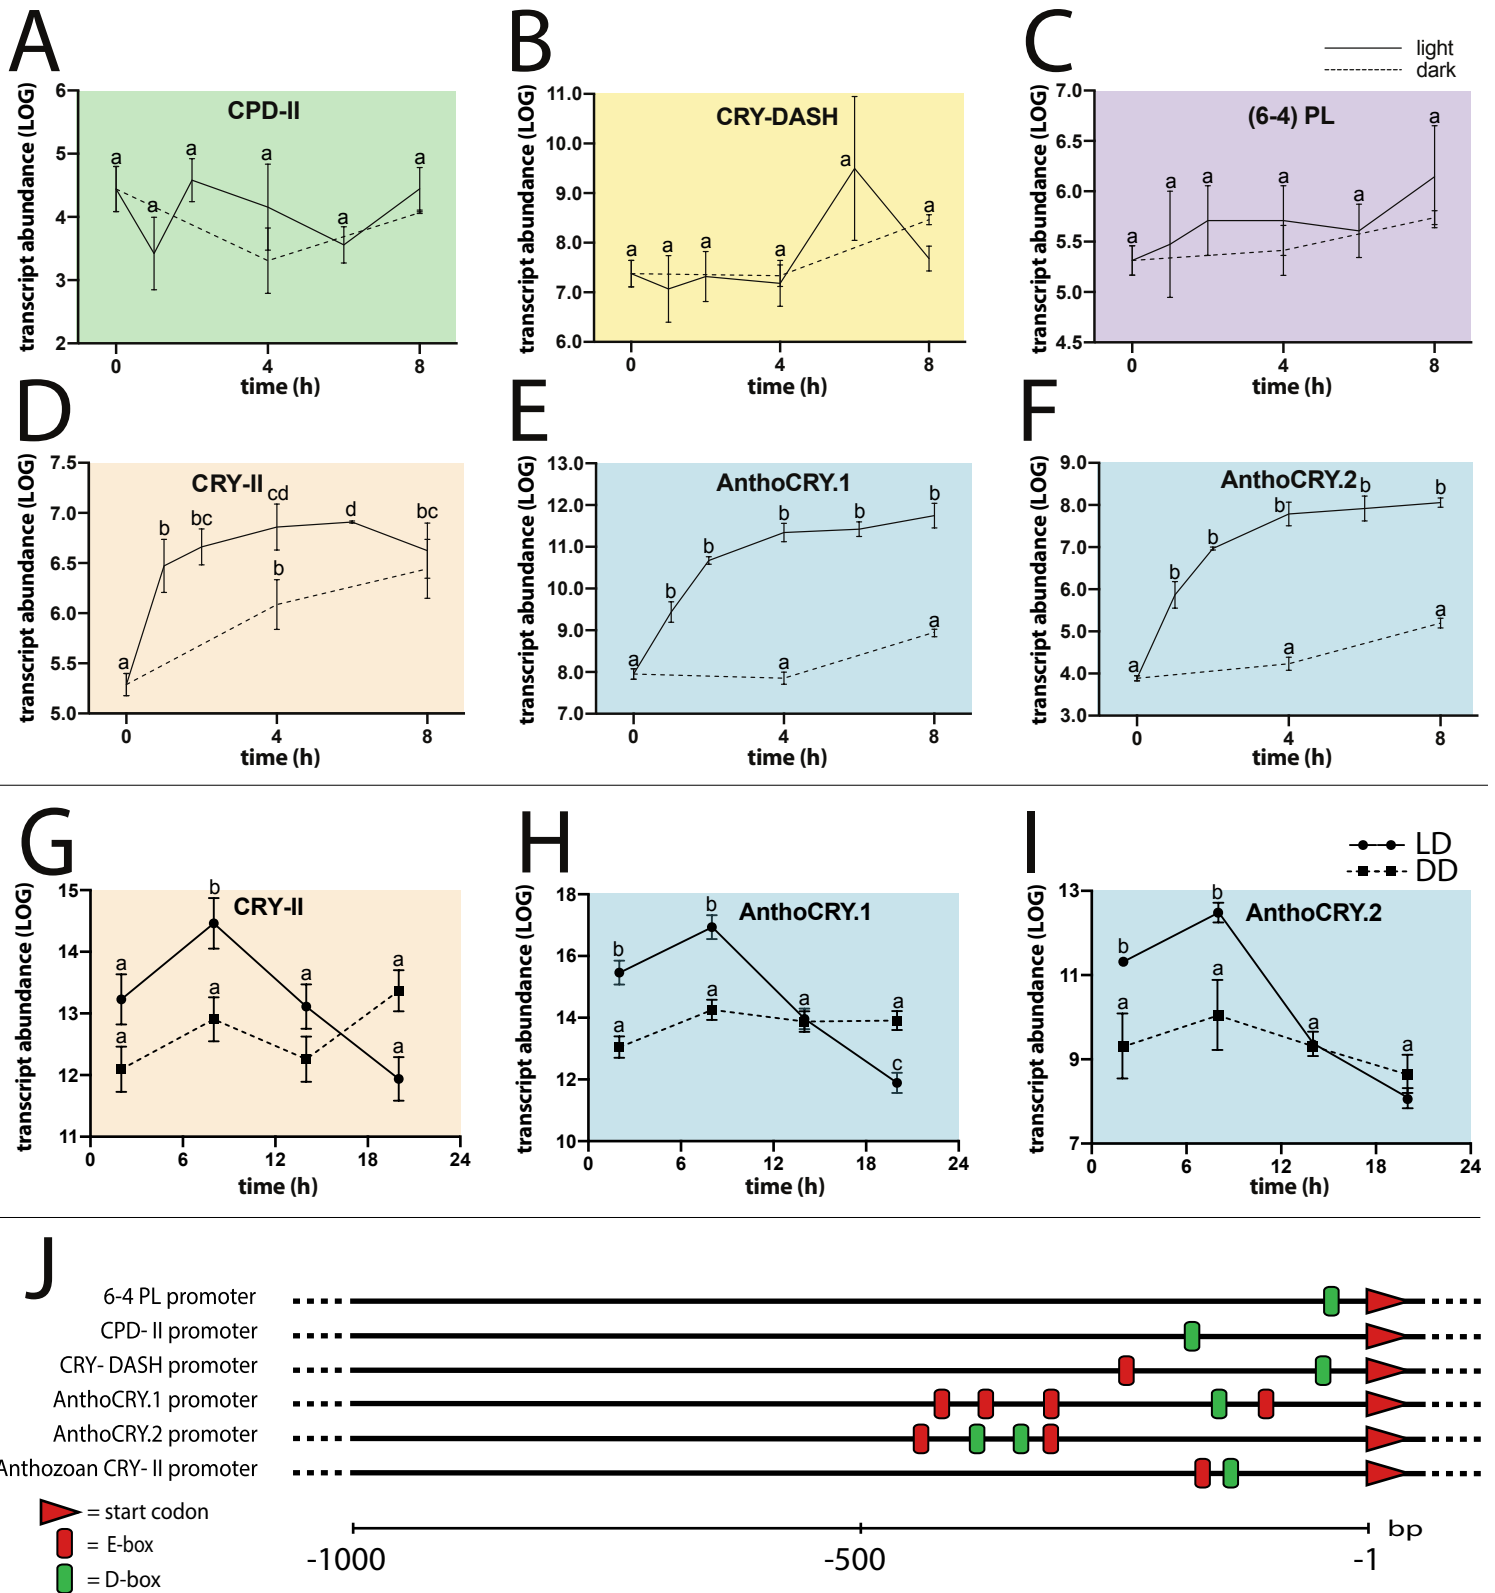

Source: https://www.biorxiv.org/content/10.1101/2020.05.28.118018v1.full.pdf
